1  
2  
3  
4  
5  
6  
7  
8  
9  
10  
11  
12  
13  
14  
15  
16  
17  
18  
19  
20  
21  
22

**Evolutionary genetic analysis uncovers multiple sympatric species with distinct  
habitat preferences and antibiotic resistance phenotypes among aquatic  
*Stenotrophomonas maltophilia* complex isolates**

**Luz Edith Ochoa-Sánchez and Pablo Vinuesa\***

Centro de Ciencias Genómicas, Universidad Nacional Autónoma de México, Cuernavaca,  
Morelos, Mexico.

**\*Correspondence:**

Corresponding Author

[vinuesa@cgc.unam.mx](mailto:vinuesa@cgc.unam.mx)

**Keywords:** multilocus sequence analysis, speciation, multidrug resistance, multispecies  
coalescent, population genetic structure, recombination, metallo-beta-lactamase,  
multivariate statistics.

**Running title:** *Stenotrophomonas* evolutionary genetics and ecology

23 **Abstract**

24 The genus *Stenotrophomonas* (*Gammaproteobacteria*) has a broad environmental  
25 distribution. *S. maltophilia* is its best known species because it is a globally emerging,  
26 multidrug-resistant (MDR), opportunistic pathogen. Members of this species are known to  
27 display high genetic, ecological and phenotypic diversity, forming the so-called *S.*  
28 *maltophilia* complex (Smc). Heterogeneous resistance and virulence phenotypes have been  
29 reported for environmental Smc isolates of diverse ecological origin. We hypothesized that  
30 this heterogeneity could be in part due to the potential lumping of several cryptic species in  
31 the Smc. Here we used state-of-the-art phylogenetic and population genetics methods to  
32 test this hypothesis based on the multilocus dataset available for the genus at pubmlst.org.  
33 It was extended with sequences from complete and draft genome sequences to assemble a  
34 comprehensive set of reference sequences. This framework was used to analyze 108  
35 environmental isolates obtained in this study from the sediment and water column of four  
36 rivers and streams in Central Mexico, affected by contrasting levels of anthropogenic  
37 pollution. The aim of the study was to identify species in this collection, defined as  
38 genetically cohesive sequence clusters, and to determine the extent of their genetic,  
39 ecological and phenotypic differentiation. The multispecies coalescent, coupled with Bayes  
40 factor analysis was used to delimit species borders, together with population genetic  
41 structure analyses, recombination and gene flow estimates between sequence clusters.  
42 These analyses consistently revealed that the Smc contains at least 5 significantly  
43 differentiated lineages: *S. maltophilia* and Smc1 to Smc4. Only *S. maltophilia* was found to  
44 be intrinsically MDR, all its members expressing metallo- $\beta$ -lactamases (MBLs). The other  
45 Smc lineages were not MDR and did not express MBLs. We also obtained isolates related  
46 to *S. acidaminiphila*, *S. humi* and *S. terrae*. They were significantly more susceptible to  
47 antibiotics than *S. maltophilia*. We demonstrate that the sympatric lineages recovered  
48 display significantly differentiated habitat preferences, antibiotic resistance profiles and  
49 beta-lactamase expression phenotypes, as shown by diverse multivariate analyses and  
50 robust univariate statistical tests. We discuss our data in light of current models of bacterial  
51 speciation, which fit these data well, stressing the implications of species delimitation in  
52 ecological, evolutionary and clinical research.

53

54

55

56

57

## 58 1. Introduction

59 Bacterial species identification and delimitation are non-trivial tasks, which are critical in  
60 certain settings such as the clinic, bio-terrorism and industry. More generally, the  
61 conclusions drawn from evolutionary and ecological analyses are strongly dependent on  
62 organismal classification, as species are the relevant units of diversity (Vinuesa et al.,  
63 2005b;Koeppel et al., 2008;Shapiro et al., 2016). Proper species delimitation is a requisite  
64 to discover the species-specific phenotypic attributes underlying their ecological niche  
65 differentiation (Cadillo-Quiroz et al., 2012;Shapiro et al., 2012;Cordero and Polz, 2014).

66 We hypothesized that problems with species delimitations have hindered progress in  
67 systematic, taxonomic and ecological research on the ubiquitous genus *Stenotrophomonas*  
68 (Gammaproteobacteria, *Xanthomonadales*, *Xanthomonadaceae*) (Palleroni and Bradbury,  
69 1993), which currently comprises 12 validly described species  
70 (<http://www.bacterio.net/stenotrophomonas.html>). This limitation particularly affects the *S.*  
71 *maltophilia* species complex (Smc) (Svensson-Stadler et al., 2011), which has long been  
72 recognized to have a broad ecological distribution, being associated with humans, animals,  
73 plants and diverse anthropogenic and natural environments (Berg et al., 1999;Ryan et al.,  
74 2009;Berg and Martinez, 2015). Although different genotyping methods, particularly  
75 AFLPs (Hauben et al., 1999), rep-PCR (Adamek et al., 2011) and multilocus sequence  
76 analysis/typing (MLSA/MLST) (Kaiser et al., 2009;Vasileuskaya-Schulz et al., 2011) have  
77 clearly revealed the existence of multiple genomic groups within the Smc, proper  
78 recognition of species borders within the complex has not yet been satisfactorily achieved.  
79 This has ultimately hindered the discovery of statistically significant associations between  
80 species and traits such as habitat preferences, antibiotic resistance phenotypes and  
81 pathogenicity potential (Adamek et al., 2011;Berg and Martinez, 2015;Deredjian et al.,  
82 2016). *S. maltophilia* is an important globally emerging and multidrug-resistant (MDR)  
83 opportunistic pathogen causing difficult-to-treat infections (Chang et al., 2015). High  
84 mortality rates are reported mainly in the immunocompromised, cancer and cystic fibrosis  
85 patients, as well as those with central venous catheters or long-lasting antibiotic therapy  
86 (Looney et al., 2009;Brooke, 2012). Therefore, the identification of significant genotype-  
87 phenotype associations is critical for the safe use of particular strains from the Smc with  
88 high potential for diverse environmental biotechnologies such as bioremediation, plant  
89 growth promotion and protection (Ryan et al., 2009;Berg and Martinez, 2015).

90 The main objectives of this study were: *i*) to identify genetically cohesive and differentiated  
91 sequence clusters (genospecies) among a collection of environmental *Stenotrophomonas*  
92 isolates by using a combination of state-of-the-art phylogenetic and population genetic  
93 methods; *ii*) to test whether such lineages exhibit distinct phenotypic and ecological  
94 attributes, as predicted by current models of bacterial speciation. We used the multilocus  
95 dataset for the genus available at pubmlst.org (Kaiser et al., 2001;Vasileuskaya-Schulz et  
96 al., 2011), and extended it with sequences extracted from complete (Crossman et al.,  
97 2008;Lira et al., 2012;Zhu et al., 2012;Davenport et al., 2014;Vinuesa and Ochoa-Sánchez,  
98 2015) and draft (Patil et al., 2016) genome sequences to assemble a comprehensive MLSA  
99 dataset with representative strains of 11 out of 12 validly described *Stenotrophomonas*  
100 species. We used this reference dataset to study our collection of environmental  
101 *Stenotrophomonas* isolates ( $n = 108$ ) recovered from the sediments and water column of

102 several rivers with contrasting levels of contamination in the state of Morelos, Central  
103 Mexico.

104 For an initial exploration of this dataset, we used thorough maximum-likelihood tree  
105 searching. The evidence from this phylogenetic analysis was used to define diverse species  
106 border hypotheses, which were formally evaluated in a Bayesian framework under the  
107 multispecies coalescent (MSC) model (Rannala and Yang, 2003;Edwards et al.,  
108 2007;Degnan and Rosenberg, 2009) by subjecting them to Bayes factor (BF) analysis (Kass  
109 and Raftery, 1995). To the best of our knowledge, this is the first study that evaluates the  
110 utility of this Bayesian statistical framework for bacterial species delimitation, which is  
111 emerging as a successful and promising strategy for species delimitation in plants and  
112 animals (Fujita et al., 2012;Aydin et al., 2014;Grummer et al., 2014). The MSC model is  
113 independent of gene concatenation and acknowledges the very well known fact that gene  
114 trees have independent evolutionary histories embedded within a shared species tree  
115 (Degnan and Rosenberg, 2006;Rosenberg, 2013). The basic MSC model assumes that gene  
116 tree discordance is solely the result of stochastic coalescence of gene lineages within a  
117 species phylogeny. Populations, rather than alleles sampled from single individuals, are the  
118 units to infer phylogeny in the MSC framework, effectively connecting traditional  
119 phylogenetic inference with population genetics, providing estimates of topology,  
120 divergence times and population sizes (Rannala and Yang, 2003;Edwards et al., 2007;Heled  
121 and Drummond, 2010).

122 Current microbial speciation models predict that bacterial species-like lineages should be  
123 identifiable by significantly reduced gene flow between them, even when recombination  
124 levels are high within species. Such lineages should also display differentiated ecological  
125 niches (Koeppel et al., 2008;Cadillo-Quiroz et al., 2012;Shapiro and Polz, 2014). This  
126 study shows the power of modern phylogenetic and population genetic methods to delimit  
127 species borders in bacteria and demonstrates that the Smc, as currently defined in  
128 pubmlst.org, genome databases and literature, contains multiple genospecies that are  
129 ecologically and phenotypically differentiated. We discuss our findings and approaches in  
130 the light of current models of bacterial speciation, highlighting the practical implications  
131 and ecological relevance of proper species delimitation.

132

133

## 134 **2. Materials and Methods**

### 135 **Sampling sites and isolation of environmental *Stenotrophomonas* strains**

136 *Stenotrophomonas* strains were recovered from the sediments and water columns at 6 sites  
137 of 4 rivers and streams in the State of Morelos, Central Mexico (Table 1, supplementary  
138 Fig. S1). These sites experience different levels of anthropogenic pollution, broadly  
139 classified as low (L), intermediate (I) and high (H), based on triplicate counts of thermo-  
140 tolerant coliforms (TTCs) on mFC agar (Oxoid). Thermotolerant *E. coli* (TTEc) counts  
141 were obtained on modified m-TEC agar (USEPA, 2002), using the one-step membrane  
142 filtration (0.45 µm) method (APHA, 2005). Water samples were taken in sterilized 1L  
143 recipients at 5-20 cm depth (2 per site). Six physico-chemical parameters of the water

144 columns were measured using a HANNA multi-parametric HI9828 instrument operated in  
145 continuous measurement mode, for 1 minute, along a 10 m transect (Fig. S2). Sediment  
146 samples (3 per site, along a 3 m linear transect) were taken from the same sites in sterile  
147 plastic cores dug 2-3 cm deep into the sediment. Samples were kept on ice until processing  
148 within 4-8 hrs (APHA, 2005). Sampling took place at the end of the dry season (April-  
149 May), between 2012 and 2014. Oligotrophic [NAA (Aagot et al., 2001) and R2A (Ultee et  
150 al., 2004) agar] and rich media [LAM (Jawad et al., 1994) and MacConkey], supplemented  
151 or not with antibiotics [trimethoprim 30 + carbenicillin 100, ciprofloxacin 4, ceftazidime 8,  
152 cefotaxime 4, imipenem 4 ( $\mu\text{g/ml}$ )] were used to isolate bacteria from these samples by  
153 plating 100  $\mu\text{l}$  of serial dilutions (1 to  $10\text{e}^{-4}$ ) in triplicate for each sample and incubation at  
154  $30^{\circ}\text{C}$  for up to 24 hrs. Single colonies were repeatedly streaked on the same media for  
155 strain purification. Bacteria were routinely grown on LB and stored frozen in this medium  
156 supplemented with 20% (V/V) glycerol at  $-80^{\circ}\text{C}$ .

157

### 158 **Determination of antibiotic resistance and $\beta$ -lactamase expression profiles**

159 A total of 15 antimicrobials from 6 families and two inhibitor/ $\beta$ -lactamase combinations  
160 were used to determine the resistance profiles of each strain by streaking them in parallel  
161 on agar plates supplemented with the antibiotics and concentrations indicated in  
162 supplementary Table S1. Double disk synergism (DDS) assays were performed to  
163 determine the expression phenotypes of specific  $\beta$ -lactamase types [Ambler class A  
164 extended spectrum beta-lactamases (ESBLs), class B metallo-beta-lactamases (MBLs) and  
165 class C cephalosporinases (AmpC)], as detailed in the legend to Fig S10. The antibiotic  
166 breakpoint concentrations and growth inhibition zones were interpreted according to the  
167 26<sup>th</sup> edition of the Clinical and Laboratory Standards Institute (CLSI, 2016) values for  
168 *Stenotrophomonas*, *Pseudomonas aeruginosa* or *Enterobacteriaceae*, when not available  
169 for the first or second genus, respectively (cutoff values are shown in Tables S1 and S2).

170

### 171 **PCR amplification of 16S rDNA sequences and their phylogenetic analysis**

172 All strains recovered were classified at the genus level by phylogenetic analysis of the 16S  
173 rRNA gene (*rrs*) sequences amplified with the universal fD1/rD1 primers (Weisburg et al.,  
174 1991), as previously described (Vinuesa et al., 2005a), and detailed in the supplementary  
175 material (supplementary protocol 1).

176

### 177 **PCR amplification and maximum likelihood phylogenetic analysis of multilocus 178 sequence data**

179 For multilocus sequence analysis (MLSA) of environmental *Stenotrophomonas* isolates we  
180 used the primers and conditions reported at <http://pubmlst.org/smaltophilia/>, except for the  
181 mutM\_steno\_6F (5'-ytccccgaagtmgaaacyac-3') and mutM\_steno\_684R (5'-  
182 gcagytctgytgcgaartacc-3') primers, which were designed *de novo* using the Primers4Clades  
183 server (Contreras-Moreira et al., 2009) fed with *mutM* orthologues identified using the

184 GET\_HOMOLOGUES package (Contreras-Moreira and Vinuesa, 2013) from  
185 *Stenotrophomonas* genome sequences (data not shown). PCR amplicons were purified and  
186 commercially sequenced at both strands by Macrogen, (South Korea). Raw reads were  
187 assembled with the phredphrap script (de la Bastide and McCombie, 2007), codon-based  
188 multiple sequence alignments generated with an in-house Perl script, and MSA borders  
189 stripped to match the reference pubmlst.org profiles. Individual gene alignments were  
190 concatenated and the resulting matrix subjected to model selection with jModelTest2  
191 (Darriba et al., 2012) for phylogenetic analysis under the maximum likelihood criterion in  
192 PhyML3 (Guindon et al., 2010). Tree searches were initiated from 1000 random seed trees  
193 and a BioNj phylogeny, under the BEST moves option, as previously described (Vinuesa et  
194 al., 2008).

195

### 196 **Identification of the 7 MLSA loci in genome sequences retrieved from GenBank**

197 We selected 24 complete (Crossman et al., 2008;Lira et al., 2012;Zhu et al.,  
198 2012;Davenport et al., 2014;Vinuesa and Ochoa-Sánchez, 2015) and draft (Patil et al.,  
199 2016) genome sequences available in GenBank to expand our dataset with additional key  
200 reference strains. The orthologs of the seven MLSA loci were identified using from single-  
201 copy homologous gene clusters computed with the GET\_HOMOLOGUES package  
202 (Contreras-Moreira and Vinuesa, 2013). We found that the *gap* gene in the draft genome  
203 sequence of strain *S. ginsengisoli* DSMC24757<sup>T</sup> (Acc. No. LDJM00000000) (Patil et al.,  
204 2016) contains a thymidine insertion at position 602 that causes a frame-shift mutation and  
205 a premature end of the gene. Consequently, the last 72 sites of this sequence were re-coded  
206 as ‘?’ (missing characters).

207

### 208 **Sequence data availability**

209 The sequences generated in this study for multilocus sequence analysis were deposited in  
210 GenBank under accession numbers KX895367-KX896038.

211

### 212 **Bayesian species delimitation using the multispecies coalescent (MSC) and Bayes** 213 **factors (BFs)**

214 Bayesian species delimitation from multilocus data under the MSC model was performed  
215 using the recent \*BEAST2 module (version 0.7.2) for BEAST 2 (Heled and Drummond,  
216 2010;Bouckaert et al., 2014), to evaluate a set of explicit hypotheses of species-boundaries.  
217 \*BEAST2 was run using the best fitting partitioning scheme (see supplementary protocol  
218 2) and the TrN+G model with empirical frequencies, without rate estimation. Trees were  
219 unlinked across partitions, setting the ploidy level to 1 for each gene tree and assuming a  
220 constant population IO population model. A non-correlated relaxed log-normal clock  
221 (Drummond et al., 2006) was assumed for each partition, fixing the clock rate of the first  
222 partition and estimating the remaining ones. A non-calibrated Yule prior was set on the  
223 species tree. The default 1/x population mean size prior was changed for a proper inverse



224 gamma prior (Baele et al., 2013), with shape parameter  $\alpha = 2$  and scale parameter  $\beta = 2$  and an initial value of 0.05. The upper and lower bounds were set to 0.001 and 1000.0, respectively. Path sampling was used to estimate the marginal likelihoods of each species delimitation model in \*BEAST2 runs for BF calculations (Lartillot and Philippe, 2006; Baele et al., 2012; Grummer et al., 2014), with the MODEL\_SELECTION 1.3.1 package. Each \*BEAST2 chain was run for  $10^8$  generations, sampling the posterior every 20000<sup>th</sup>, with 10 replicate runs and the alpha value set to 0.3, applying 50% burnin. A final triplicate \*BEAST2 analysis was set up to get the final estimate of the multispecies phylogeny under the best delimitation model with the same parameters, priors, chain length and sampling frequency described above. Convergence and mixing of replicate runs was checked in tracer (<http://tree.bio.ed.ac.uk/software/tracer/>), as well as the effective sample size values for each parameter. The species tree corresponding to the best species-delimitation hypothesis was visualized with densitree (Bouckaert, 2010), on combined post-burnin (50%) species tree files generated with logcombiner. A summary tree was generated from the latter with treeannotator and visualized with FigTree v1.4.2 <http://tree.bio.ed.ac.uk/software/figtree/>.

240

## 241 **DNA polymorphism, population structure and recombination analyses**

242 Descriptive statistics for DNA polymorphisms, population differentiation, gene flow, diverse neutrality and population growth tests, as well as coalescent simulations, were computed with DNAsp v.5.10.01 (Rozas et al., 2003), as previously described (Vinuesa et al., 2005b). Bayesian analysis of population structure based on multilocus sequence data was performed in STRUCTURE v2.3.4 under the admixture and correlated gene frequencies models (Pritchard et al., 2000; Falush et al., 2003; 2007). Twenty runs were launched for each  $K$  value between 2 and 10, with  $10^5$  steps sampled after a burnin of  $2 \times 10^5$  chain iterations. The best  $K$  value was defined by the Evanno (Evanno et al., 2005) and Pritchard (Pritchard et al., 2000) methods, as implemented in CLUMPAK (Kopelman et al., 2015). Estimation of recombination rates of selected lineages was performed with ClonalFrameML v1.0.9 (Didelot and Wilson, 2015), using ML trees and Ti/Tv ratios estimated under the HKY85+G model with PhyML3 (Guindon et al., 2010).

254

## 255 **Statistical analyses**

256 All statistical and graphical analyses were performed with base R (R Development Core Team, 2016) and add-on packages. Basic data manipulation, transformation and graphical displays were achieved with functions of the tidyverse metapackage (<https://CRAN.R-project.org/package=tidyverse>). Tests for normality, homoscedasticity, outliers and skew were performed with the car (<https://cran.r-project.org/package=car>) and moments (<https://cran.r-project.org/package=moments>) packages. Robust ANOVA and associated *post-hoc* analyses (Wilcox, 2016) were performed with the WRS2 package (<https://cran.r-project.org/package=WRS2>). Empirical distributions of test statistics were generated by bootstrapping with the boot package (<https://cran.r-project.org/package=boot>). Multivariate association plots for categorical data were performed with the vcd package (<https://cran.r->

266 [project.org/package=vcd](https://cran.r-project.org/package=vcd)). Multiple correspondence analysis (MCA) was performed with  
267 the FactoMineR (<https://cran.r-project.org/package=FactoMineR>) and factoextra packages  
268 (<https://cran.r-project.org/package=factoextra>).



## 269 3. Results

### 270 3.1 Evaluation of different isolation media for the recovery of *Stenotrophomonas* from 271 aquatic ecosystems with contrasting degrees of fecal contamination

272 We sampled 6 sites located in four rivers/streams of Morelos (supplementary figure S1)  
273 that were ranked into three categories based on their pollution level (low, intermediate,  
274 high), based on counts of thermotolerant fecal coliforms and *E. coli* (Table 1). Additional  
275 physicochemical parameters of each sampling site are presented in Fig. S2. Classification  
276 of the isolates at the genus level was based on the phylogenetic analysis of 16S rRNA gene  
277 sequences ( $n = 697$ ), as shown in Fig. S3. *Stenotrophomonas* was the second most abundant  
278 genus ( $n = 154$ , 22.1 %) recovered in our collection, after *Pseudomonas* ( $n = 239$ , 34.3 %),  
279 as shown in Fig S4. The inset in Fig. S4 shows a Trellis barplot summarizing the relative  
280 efficiency of the different microbiological media tested for the recovery of  
281 *Stenotrophomonas*. The analysis reveals that environmental *Stenotrophomonas* strains can  
282 be efficiently recovered on the oligotrophic NAA medium supplemented with imipenem (8  
283  $\mu\text{g/ml}$ ; > 90% recovery efficiency). The rich McConkey medium amended with imipenem  
284 is also useful (4  $\mu\text{g/ml}$ ; ~60%), selecting non-fermenting (whitish) colonies.

285

### 286 3.2 Phylogenetic structure of the genus *Stenotrophomonas* and the definition of species 287 border hypotheses

288 We used intense maximum likelihood (ML) tree searching (see methods) to obtain a global  
289 hypothesis of the phylogenetic structure of the genus based on 194 non-redundant  
290 multilocus STs (Fig. 1). This dataset contains sequences retrieved from pubmlst.org (seven  
291 loci for 103 STs representative of all the “classic” genogroups and clusters defined in  
292 previous works (Kaiser et al., 2009; Vasileuskaya-Schulz et al., 2011), plus 24 selected  
293 reference strains from different species for which the genome sequences were retrieved  
294 from GenBank and the 7 loci extracted, as explained in methods. This comprehensive set of  
295 reference strains comprises 11 out of 12 validly describes species of the genus as of April  
296 2017. Recently *S. tumulicola* (Handa et al., 2016) was added to the list  
297 ([www.bacterio.net/stenotrophomonas.html](http://www.bacterio.net/stenotrophomonas.html); last access April 10th, 2017), which is the only  
298 species missing from our analysis, as it lacks a genome sequence or MLSA data in  
299 pubmlst.org. To this set we added the sequences generated in this study for 108  
300 environmental isolates from Mexican rivers, comprising 63 haplotypes (distinct multilocus  
301 sequence types). Figure 1A presents the best hypothesis found among 1001 independent  
302 tree searches (the lnL profile of the tree search is shown in figure S5A), displaying the Smc  
303 clade in collapsed form. The ML tree was rooted using four *Xanthomonas* species as the  
304 outgroup, chosen based on the evidence of a comprehensive ML phylogeny of nearly full-  
305 length 16S rRNA gene sequences for all type strains currently described in the order  
306 *Xanthomonadales* (Fig. S6). *S. panacihumi* (Yi et al., 2010) represents the most basal  
307 lineage of the genus, which is consistent with its position on the 16S rRNA gene phylogeny  
308 (Fig. S6). However, this species was described based on the *rrs* sequence analysis of a  
309 single isolate and currently has a non-validated taxonomic status. Two large clades follow,  
310 labeled I and II on figure 1A. All species grouped in clade I are of diverse environmental  
311 origin, lacking strains reported as opportunistic pathogens. Three of our environmental

312 isolates tightly cluster with the type strain of *S. acidaminiphila* (Assih et al., 2002),  
313 including strain ZAC14D2\_NAIMI4\_2, for which we have recently reported its complete  
314 genome sequence (Vinuesa and Ochoa-Sánchez, 2015). The type strain of this species  
315 (AMX19<sup>T</sup>, LMG22073<sup>T</sup>) was isolated from the sludge of a lab-scale anaerobic chemical  
316 waste water reactor in Iztapalapa, Mexico City, 1999 (Assih et al., 2002). A single isolate  
317 of our collection is phylogenetically related to *S. humi*, while 7 others form a perfectly  
318 supported clade with the type strain of *S. terrae* (Heylen et al., 2007). In conclusion, all  
319 environmental isolates grouped in clade I were conservatively classified as indicated by the  
320 labeled boxes on Fig. 1A, based on the very strong support of the monophyletic clusters  
321 formed with the corresponding type strains.

322 Clade IIa groups strains of *S. chelatiphaga* and *S. rhizophila* and clade IIb groups strains of  
323 the *S. maltophilia* species complex (Smc) (Fig. 1A). Both of them hold human  
324 opportunistic pathogens and environmental isolates, and suffer from taxonomic problems.  
325 The taxonomic inconsistency of classifying strains of genogroups #8 and #10 as *S.*  
326 *maltophilia* was previously recognized (Vasileuskaya-Schulz et al., 2011). They cluster  
327 within the *S. chelatiphaga*-*S. rhizophila* clade, making *S. maltophilia* polyphyletic. *S.*  
328 *maltophilia* strains of genogroup #8 were already recognized to belong to *S. rhizophila*, but  
329 the taxonomic status of its sister clade, genogroup #10, holding strains labeled as *S.*  
330 *maltophilia*, was not clarified (Vasileuskaya-Schulz et al., 2011).

331 Figure 1B shows the same phylogeny presented in Fig. 1A, but collapsing clades I and IIa,  
332 and displaying the Smc strains grouped in cluster IIb. All terminal clades containing only  
333 reference sequences were also collapsed to avoid excessive cluttering. Figure S5B displays  
334 the same tree but without collapsing those clusters. The Smc clade was conservatively split  
335 into 5 potential species (labeled boxes in Fig. 1B) based on the deep and strongly supported  
336 branches subtending MLSA phylogroups Smc1-Smc4, and taking into account the location  
337 of the well characterized *S. maltophilia* model strains K279a (Crossman et al., 2008), D457  
338 (Lira et al., 2012) and the type strain of the species ATCC 13637<sup>T</sup> (Davenport et al., 2014).  
339 The latter three are spread across the clade labeled as *S. maltophilia* (Fig. 1B). Each of the  
340 phylogroups Smc1 to Smc4 currently holds ecologically coherent groups of strains: Smc1  
341 and Smc2 contain exclusively Mexican river isolates recovered in this study, Smc3 groups  
342 cystic fibrosis isolates and Smc4 predominately rhizosphere isolates from diverse plants  
343 and parts of the world. In contrast, the large *S. maltophilia* clade holds heterogeneous  
344 groups of isolates of clinical and environmental origin, including the previously defined  
345 MLSA phylogroups A to E (Kaiser et al., 2001; Vasileuskaya-Schulz et al., 2011) and  
346 AFLP genogroups #1 to #10 (Hauben et al., 1999). We conservatively define a new MLSA  
347 phylogroup F, comprising isolates of clinical and environmental origin from different  
348 continents, but dominated by river isolates reported herein (Fig. 1B). We note that *S.*  
349 *pavanii* DSM 25135<sup>T</sup>, an endophytic N<sub>2</sub>-fixing bacterium isolated from sugarcane in Brazil  
350 (Ramos et al., 2010), is clearly nested within genogroup #1, closely related to the reference  
351 strain *S. maltophilia* D457 (Fig. 1B). This represents an additional taxonomic inconsistency  
352 for the *S. maltophilia* clade not previously reported. Here we suggest that *S. pavanii* is a  
353 late heteronym of *S. maltophilia*. *S. africana*, nested within genogroup #4, had already been  
354 described as a later heterotypic synonym of *S. maltophilia* (Coenye et al., 2004; Kaiser et  
355 al., 2009), the same as *Pseudomonas beteli* 962<sup>T</sup>, related to MLSA genogroup E, and *P.*  
356 *hibiscicola* ATCC19867, related to genogroup #3 (Hauben et al., 1999; Vasileuskaya-

357 Schulz et al., 2011). The latter two species were already recognized in 1990 to be  
358 misclassified based on the analysis of an extensive set of phenotypic features, being  
359 synonyms of *S. maltophilia* (Van Den Mooter and Swings, 1990). The taxonomic status of  
360 *S. tumulicola* (Handa et al., 2016) could not be revised in the present work because it lacks  
361 multilocus sequence data.

362

### 363 **3.3 Bayesian species delimitation based on the multispecies coalescent (MSC) model** 364 **and Bayes factor (BF) analysis of marginal likelihoods**

365 We used a recent software implementation of the MSC model (Heled and Drummond,  
366 2010;Bouckaert et al., 2014) to test the explicit species delimitation hypotheses highlighted  
367 in Figs. 1A and 1B by means of BF analysis of marginal likelihoods (Grummer et al., 2014)  
368 in a formal Bayesian statistical framework. The best partitioning scheme (see  
369 supplementary protocol 2 and Fig. S7) was used for all \*BEAST2 runs. Of particular  
370 interest to this work was the evaluation of the following five species delimitation  
371 hypotheses within the Smc: split1 (species assignments as defined by the shaded areas on  
372 Figs. 1A and 1B), lump\_ *S. maltophilia*+Smc1, lump\_ *S. maltophilia*+Smc12, lump\_ *S.*  
373 *maltophilia*+Smc123, lump\_ *S. maltophilia*+Smc1234, which successively lump the *S.*  
374 *maltophilia* sequence cluster with the proposed Smc1-Smc4 genospecies (Table 2 and Fig.  
375 1B). Analysis of the logfiles for the path sampling runs for each model and replicate had  
376 effective sample size (ESS) values > 150 for all parameters, most of them with ESSs >>  
377 500. As shown in Table 2, the split1 hypothesis was the favored one as it attained the  
378 highest marginal likelihood. The BF analysis provides overwhelming evidence (Table 2)  
379 that the Smc, as actually defined in pubmlst.org, lumps multiple cryptic species, strongly  
380 supporting the species delimitation hypothesis presented in Fig. 2B, which conservatively  
381 splits the complex into the 5 species: *S. maltophilia* and the four new lineages Smc1, Smc2,  
382 Smc3 and Smc4. Smc1 and Smc2 contain only Mexican representatives of environmental  
383 *Stenotrophomonas* sampled in this study. The split1 vs. lump\_cluster#8+cluster#10 (Fig  
384 1A) model was also evaluated, providing overwhelming evidence in favor of separating the  
385 two genogroups #8 and #10 as distinct species ( $\ln$ -BF > 5, Table 2). Supplementary figures  
386 S8 and S9 show the consensus and DensiTree (see methods) species tree representations,  
387 respectively, of the merged (3 replicate runs), post-burnin (50%) samples, for the best  
388 hypothesis.

389

### 390 **3.4 Population genetic structure analysis of Mexican environmental *S. maltophilia*** 391 **complex isolates**

392 In order to challenge the results of the multispecies coalescent (MSC)-based species  
393 delimitations presented in the previous section, we performed a Bayesian population  
394 clustering analysis on all Mexican isolates grouped within the Smc clade (Fig. 1B) using  
395 STRUCTURE (see methods). We included also the Smc4 lineage, identified among  
396 pubmlst.org sequences, as an outgroup control. Figure 2 shows the optimally aligned  
397 STRUCTURE barplots for the 20 replicate runs made for the indicated *K* values, depicting  
398 the ancestry proportions of each individual. Evanno's delta-*K* method estimated an optimal

399 number of 3 clusters, while Pritchard's method suggested an optimal  $K = 6$ . This analysis  
400 uncovered a strong population subdivision of the Mexican Smc isolates, which is consistent  
401 with the MSC-based species delimitation (Fig. 1B). Given the independent evidence from  
402 the MSC analysis, we favor a conservative  $K = 4$ , as it consistently resolves the same 4  
403 clusters classified as distinct species by the phylogenetic approach (*S. maltophilia*, Smc1,  
404 Smc2 and Smc4). Detailed inspection of the barplots reveals that already at  $K = 4$  an  
405 important substructure exists within the *S. maltophilia* and Smc1 lineages. At  $K = 6$  the  
406 Mexican *S. maltophilia* population gets subdivided into three clusters, while Smc1 is split  
407 into two subgroups. Clear evidences of admixture exist in both clades, suggesting that gene  
408 flow and recombination might be at play in these clusters.

409

### 410 **3.5 McDonald-Kreitman (MK) neutrality test, genetic differentiation and gene flow** 411 **estimates between pairs of environmental lineages of the *S. maltophilia* complex**

412 To determine the statistical support of the major clusters revealed by STRUCTURE we  
413 computed the  $K^*_{ST}$  index of population genetic differentiation (Hudson et al., 1992)  
414 between them. The results presented in Table 3 indicate that the Smc1, Smc2 and *S.*  
415 *maltophilia* lineages are strongly differentiated ( $p < 0.001$ ) based on the  $K^*_{ST}$  index, with  
416 multiple fixed differences between populations (range 9 - 45) and mean population  
417 divergences ( $D_{xy}$ )  $> 4.5\%$ . The high  $F_{ST}$  fixation indices (range 0.43 – 0.59) further denote  
418 very strong population differentiation. This is consistent with the low numbers of effective  
419 migrants per generation estimated ( $Nm$  range 0.34 – 0.66), indicating limited genetic flux  
420 between these lineages. We applied the MK test (McDonald and Kreitman, 1991) and  
421 computed the “neutrality index” ( $NI$ ) (Rand and Kann, 1996) to test if the observed  
422 polymorphisms between pairs of lineages have evolved by the accumulation of neutral  
423 mutations by random drift, the fixation of adaptive mutations by selection, or a mixture of  
424 the two. As shown in Table 3, the  $G$  and  $NI$  indices for pairwise species comparisons  
425 indicate that fixed differences between species are due to nonsynonymous differences more  
426 often than expected, suggesting that positive selection may be driving divergence of Smc1  
427 and *S. maltophilia* from Smc2. This signal is not significant ( $p = 0.077$ ) for the Smc1 and *S.*  
428 *maltophilia* comparison.

429

### 430 **3.6 Comparative analysis of DNA polymorphisms and recombination rates across the** 431 ***S. maltophilia* complex (Smc) and *S. terrae* lineages**

432 Table 4 presents basic descriptive statistics of DNA polymorphisms, neutrality and  
433 population growth tests computed for the Mexican populations/genospecies with  $\geq 10$   
434 isolates (Smc1, Smc2, *S. maltophilia* and *S. terrae*. Based on their average nucleotide  
435 diversity per site ( $\pi$ ) values, the lineages sort in the following decreasing order of diversity:  
436 *S. maltophilia*  $>$  Smc1  $>$  *S. terrae*  $>$  Smc2. The high  $\pi$  values, high numbers of haplotypes  
437 ( $h$ ) and the high haplotype diversity values ( $Hd$ ) consistently reveal that species in the  
438 genus comprise notoriously diverse gene pools. Tajima's  $D$  values are all negative, but non-  
439 significant, suggesting that the loci are either under purifying selection or that populations  
440 are undergoing expansions. We used the  $R_2$  population growth test statistic (Ramos-Onsins



441 and Rozas, 2002) to test the null hypothesis of constant population size. Since all  $p$ -values  
442 were  $> 0.1$ , there is no evidence of population expansion.

443 Table 5 shows the estimates for  $R/\theta$ , the ratio between the mean number of  
444 recombination to mutation events. The ratios are  $> 1$  (except for *S. terrae*) and for Smc2  
445 and *S. maltophilia* the recombination events are estimated to be almost twice and nearly  
446 three times the number of mutation events, respectively. This indicates that homologous  
447 recombination events introduce significantly more polymorphisms into the  
448 *Stenotrophomonas* genomes than point mutations. The inverse mean DNA import length  
449 estimates ( $1/\delta$ ) suggest that on average rather long sequence stretches are affected by  
450 recombination (range 375-1472 nt), with a considerable mean sequence divergence (range  
451 0.009-0.065).

452

### 453 **3.7 High diversity of novel STs among the Mexican Smc isolates**

454 The allele numbers and STs were determined for each of the 77 isolates in the Smc (Smc1  
455 = 11, Smc2 = 15 and *S. maltophilia* = 51) recovered from Mexican rivers, by comparing  
456 them with the corresponding 177 STs and associated alleles downloaded from pubmlst.org  
457 (as of Nov. 18<sup>th</sup>, 2016) using an in house Perl script. A high diversity of new alleles was  
458 discovered, as summarized in Table S4. Only the ST139, displayed by the Mexican *S.*  
459 *maltophilia* isolate ESTM1D\_MKCAZ16\_6, was previously reported in pubmlst.org,  
460 highlighting the novelty of the genotypes recovered in this study. A single entry is currently  
461 found in pubmlst.org for ST139, which corresponds to the Spanish isolate S3149-CT11 (id  
462 220), recovered in 2007 from a surgical wound of a patient treated in an hospital from  
463 Barcelona. The Mexican Smc strains add 56 new STs (numbers 178 – 233) to those  
464 reported in the pubmlst.org database, with ST219 being the most prevalent one (see  
465 supplementary Tables S3, S4 and Figure S10), shared by 9 isolates recovered from the  
466 sediments of the highly contaminated TEX site (Table 1), both on MK and NAA media.

467

### 468 **3.8 Multivariate association mapping of species, antimicrobial resistance phenotypes** 469 **and habitat preferences by multiple correspondence analysis (MCA)**

470 We used MCA to visualize the associations between the antibiotic resistance profiles,  $\beta$ -  
471 lactamase production phenotypes (Fig. S11), habitat preferences and species assignments  
472 (Figs. 1A and 1B) made for the Mexican *S. maltophilia*, Smc1, Smc2 and *S. terrae* isolates  
473 (all with  $> 10$  isolates /species). Figure 3 depicts the MCA factor-individual biplot resulting  
474 from the analysis of 17 active variables and 4 supplementary categorical variables, listed in  
475 the figure caption. The clouds of individuals for each species were hidden (visible in Fig.  
476 S12) to avoid over-plotting, but the 95% confidence intervals (CIs) for species are shown as  
477 color-coded ellipses. The first two dimensions explain 45.3% of the variance, the first  
478 dimension accounting for  $> 3.8$  times the variability explained by the second and following  
479 ones, as shown in the screeplot presented in Fig. S13A. The variable plot depicted in Fig.  
480 S13B reveals that the active variable species is most correlated one with the two first two  
481 dimensions, indicating that their resistance profiles and  $\beta$ -lactamase expression phenotypes

482 are distinct. The variables GM, KA, MER, FEP, TET, ATM (abbreviations defined in the  
483 legend to Fig. 3),  $\beta$ -lactamase expression and the MDR condition are strongly correlated  
484 with the first component, while IMP and SM are the variables most strongly associated  
485 with the second dimension (Fig. S13B). Figure 3 shows that the *S. maltophilia* (malt)  
486 strains form a distinct and independent cloud that is characterized by a very strong  
487 association with a resistance status to the following antibiotics: CAZ, CAZ.CLA, GM, FEP,  
488 GM, KA and SM. It is also strongly associated with the MDR condition and metallo- $\beta$ -  
489 lactamase production. The latter are the most-strongly contributing variables for the  
490 delimitation of this group, as depicted in the variable-categories MCA map presented in  
491 Fig. S14. *S. maltophilia* shows a preference for the sediments of contaminated sites. The  
492 resistance phenotypes and habitat preferences of the Smc1 and Smc2 lineages largely  
493 overlap, those of *S. terrae* being more differentiated, but partially overlapping with the 95%  
494 CI ellipse for Smc2. The Smc1 and Smc2 lineages are strongly associated with non MDR,  
495 aminoglycoside, P.T. and Tm.Cb sensitivity, showing a preference for the water column of  
496 clean or moderately contaminated sites (Fig 3 and Fig S13). The *S. terrae* isolates are  
497 distinctly and strongly associated with carbapenem and ATM sensitivity (Fig 3 and Fig  
498 S14). The statistical significance of these antibiotic resistance and habitat preference  
499 patterns will be formally tested in the next two sections, respectively.

500

### 501 **3.9 Only *S. maltophilia* is truly multidrug-resistant (MDR) and isolates from polluted** 502 **sites express resistance to more antibiotic families**

503 We performed one-way ANOVA analyses to evaluate differences *i*) in the mean number of  
504 resistances to individual antibiotics (NumR), *ii*) in the mean number of distinct drug  
505 families (NumFam) across species, and *iii*) to determine whether *S. maltophilia* isolates  
506 recovered from high and low pollution sites have the same NumR and NumFam. Figures  
507 4A, 4B, 4E and 4F display violin and boxplots for the raw count data, which revealed  
508 skewed, non-normal distributions, with a few outliers. Key assumptions (homoscedasticity  
509 and normality) made by standard one-way ANOVA were formally tested (Tables S5, and  
510 S6), which confirmed multiple cases of highly significant departures from normality.  
511 Consequently, we performed robust one-way ANOVA (Wilcox, 2016) using trimmed  
512 means ( $tr = .2$ ) and bootstrap ( $nboot = 2000$ ) to simulate the distribution of the trimmed  
513 sample means and compute the appropriate critical values for the confidence intervals (95%  
514 CIs). Figs. 4C and 4D depict mean plots with 95% CIs for the NumR and NumFam,  
515 respectively, across the four species with > 10 isolates. These clearly show that *S.*  
516 *maltophilia* strains express significantly higher mean $_{(tr=.2)}$  NumR (12.63) and NumFam  
517 (4.66) than the other three species, only *S. maltophilia* being truly MDR. Highly significant  
518 results for both the NumR [ $F_t = 176.3447$ ,  $p = 0$ . Variance explained ( $\sigma^2$ ) = 0.821; effect  
519 size ( $e.s.$ ) = .906] and NumFam ( $F_t = 32.2755$ ,  $p = 0$ ;  $\sigma^2 = .511$ ;  $e.s. = .715$ ) were obtained,  
520 thus rejecting the null hypothesis of equal trimmed means for both variables across species,  
521 and revealing huge effect sizes (>.8). A Wilcox robust *post-hoc* test of the trimmed mean  
522 NumR and NumFam comparisons across pairs of species confirms that all those involving  
523 *S. maltophilia* are very highly significant ( $p = 0$ ; Figs. S15A and S15B, Tables S7 and S8),  
524 as indicated by asterisks on the mean $_{(tr=.2)}$  plots shown in Figs. 4C and 4D.



525 Sample sizes for *S. maltophilia* isolates recovered from sites with high and low pollution  
526 were large enough (Fig. 4E) to test the hypothesis of equal NumR and NumFam conditional  
527 on pollution level. We used the robust *yuenbt* ( $tr = .2$ ,  $nboot = 998$ ) method for independent  
528 mean comparisons (Wilcox, 2016). The tests for NumR [ $T_y = 2.1964$ ,  $p = 0.038$ ;  $mean_{(tr=.2)}$   
529 difference = 1.233,  $CI_{95\%} = (0.0663, 2.4004)$ ,  $e.s. = .43$ ] and for NumFam [ $T_y = 2.6951$ ,  $p$   
530 = 0.022;  $mean_{(tr=.2)}$  difference = 0.95,  $CI_{95\%} = (0.1636, 1.7364)$ ,  $e.s. = .5$ ], indicating that  
531 both variables have significantly higher values in the high-pollution sites (Figs. 4G and  
532 4H). However, given that the 95% *CI*s of the mean NumR comparison overlap (Fig. 4G),  
533 and that a high number of tied (repeated) values occur (Fig. 4E), we run also Wilcox's  
534 robust percentile bootstrap method for comparing medians [*medpb2* ( $nboot = 2000$ )], which  
535 provides good control over the probability of Type I error when tied values occur. For  
536 NumR the test could not reject the null of equal medians [ $M^* = 1$ ,  $p = .094$ ,  $CI_{95\%} = (0,$   
537  $2.5)$ ], but was significant for NumFam [ $M^* = 1$ ,  $p = .0495$ ,  $CI_{95\%} = (0, 2)$ ].

538

### 539 **3.10 *Stenotrophomonas* species differ in their $\beta$ -lactamase expression patterns and** 540 **only *S. maltophilia* strains express metallo- $\beta$ -lactamases**

541 Association plots (Fig. 5) revealed a very highly significant association ( $p \approx 0$ ) between  
542 species and type of  $\beta$ -lactamases expressed (Fig. S11). Metallo- $\beta$ -lactamase expression was  
543 significantly and exclusively associated with *S. maltophilia* isolates. Most isolates from the  
544 Smc1 and Smc2 lineages did not express any kind of  $\beta$ -lactamase, although expression of  
545 extended spectrum of  $\beta$ -lactamases could be detected in a few isolates of these species. No  
546  $\beta$ -lactamase expression was detected in *S. terrae* isolates.

547

### 548 **3.11 The prevalence of environmental *Stenotrophomonas* species recovered from** 549 **Mexican rivers is significantly associated with habitat and pollution level**

550 We performed a multi-way association analysis to test the null hypothesis that  
551 *Stenotrophomonas* species prevalence is independent of isolation habitat (sediment vs.  
552 water column), the pollution level of the sampling site (Table 1) and isolation medium (Fig.  
553 6). The test strongly rejects the null hypothesis ( $p < .00001$ ). *S. maltophilia* was mainly  
554 recovered on MK plates, being significantly associated with polluted sediments. The Smc1  
555 lineage displayed a moderately significant association with clean water columns, although  
556 some isolates could also be recovered from contaminated sediments using NAA, which is  
557 consistent with the MCA results presented in Fig. 3. In contrast, Smc2 isolates were very  
558 significantly overrepresented in the water columns of clean rivers and underrepresented in  
559 sediments, suggesting a high level of ecological specialization. *S. terrae* isolates were  
560 mainly recovered on oligotrophic NAA plates from the sediments of clean sites (Table 1).

561

## 562 4. Discussion

563 In this study we demonstrate the power of complementary phylogenetic and population  
564 genetics approaches to delimit genetically and ecologically coherent species among a  
565 diverse collection of environmental isolates of the genus *Stenotrophomonas*. Importantly,  
566 this is done based exclusively on molecular evolutionary criteria (Vinuesa et al., 2005b),  
567 without using any arbitrary sequence or phenetic similarity cut-off values, as embraced by  
568 the standard polyphasic approach that dominates current bacterial taxonomic practice  
569 (Kämpfer and Glaeser, 2012). The robustness of the species delimitations proposed here are  
570 supported by the statistically significant associations they exhibit with distinct habitat  
571 preferences, antibiotic resistance profiles, MDR status and  $\beta$ -lactamase expression  
572 phenotypes.

573 To our knowledge, this is the first study that used the multispecies coalescent (MSC) model  
574 (Rannala and Yang, 2003; Edwards et al., 2007; Degnan and Rosenberg, 2009) coupled with  
575 Bayes factor (BF) analyses (Kass and Raftery, 1995) for microbial species delimitation.  
576 The MSC model has the virtue of relaxing the implicit assumption made by the  
577 concatenation approach that the phylogeny of each gene is shared and equal to that of the  
578 species tree. Although this assumption is problematic, the concatenation approach is the  
579 current standard in microbial multilocus sequence analysis (Gevers et al., 2005; Vinuesa,  
580 2010; Glaeser and Kämpfer, 2015), including phylogenomics (Rokas et al., 2003; Wu and  
581 Eisen, 2008). It has been shown that phylogenetic estimates from concatenated datasets  
582 under coalescence are inconsistent (Kubatko and Degnan, 2007; Song et al., 2012), that is,  
583 converge to wrong solutions with higher probability as the number of concatenated loci  
584 increases. However, the impact of this inconsistency still needs to be thoroughly evaluated  
585 with clonally multiplying microbial organisms experiencing different rates of  
586 recombination (Hedge and Wilson, 2014). In our analyses, the topology of the ML  
587 phylogeny inferred from the concatenated dataset (Fig. 1) is largely congruent with the  
588 Bayesian species tree inferred under the MSC (Fig. S8). It is worth noting that the numbers  
589 on the branches in this type of species trees denote the estimated population sizes. That of  
590 *S. maltophilia* is about 1 order of magnitude larger than the population size estimates for  
591 the Smc1 and Smc2 genospecies (Fig. S8), which reflects the genetic heterogeneity of  
592 strains grouped in the *S. maltophilia* lineage, which includes the majority of the Mexican  
593 isolates, along with reference strains from the pubmlst.org and genome databases, isolated  
594 across the globe. Lumping this heterogeneous set of recombining sub-lineages into a single  
595 species results in coalescent events higher up in the species tree than those observed for the  
596 Smc1 and Smc2 lineages. This is consistent with the marked internal structure revealed by  
597 the Bayesian structure analysis within *S. maltophilia* (Fig. 2), which suggests that  
598 additional cryptic species may be found within the *S. maltophilia* lineage. Patil and  
599 colleagues recently proposed that the type strains of *S. africana*, *P. beteli* and *P.*  
600 *hibiscicola*, which are phylogenetically placed within the *S. maltophilia* clade (Fig. 1A),  
601 and have been reclassified as *S. maltophilia*, actually represent distinct species, based on  
602 their estimates of genomic average nucleotide identity values < 94% (Patil et al., 2016). In  
603 our view, these clusters represent incipient species that are still capable of recombining  
604 between them, as suggested by the admixture found in the STRUCTURE barplots (Fig. 2)  
605 and by our estimates for recombination within *S. maltophilia* (Table 5). Further  
606 investigations involving comparative and population genomics are required to identify clear

607 signatures of speciation within the *S. maltophilia* sub-lineages, including “speciation genes  
608 and islands” (Shapiro et al., 2016). Despite the conservative approach taken in this study,  
609 the BF analysis provides statistical support in favor of splitting the *S. maltophilia* complex  
610 as currently defined in pubmlst.org into the following 5 broad evolutionary lineages: *S.*  
611 *maltophilia* and the genospecies Smc1 to Smc4. Overwhelming support ( $\ln\text{-BF} > 5$ ) was  
612 also obtained indicating that genogroup #10 (Vasileuskaya-Schulz et al., 2011), the sister  
613 clade of *S. rhizophila* (genogroup #8), constitutes an independent, non-described species  
614 (Table 2). This is of practical importance from a biotechnological perspective because it has  
615 been argued that plant-associated *S. rhizophila* strains (Vasileuskaya-Schulz’s genogroup  
616 #8) can be safely and easily separated from *S. maltophilia* pathogens in clade IIb (Berg and  
617 Martinez, 2015) based on 16S rRNA gene sequences and *ggs* and *smeD* PCR-based  
618 typing (Ribbeck-Busch et al., 2005). However, it would be important to define differences  
619 of the former with strains in the sister genogroup #10, which holds both rape rhizosphere  
620 and human blood and tigh bone infection isolates. In summary, our MSC-BF analysis  
621 provided strong evidence for the existence of 5 new species in the analyzed dataset.

622 Considering that the MSC model implemented in \*BEAST 2 was not specifically  
623 developed for bacteria, and given that this model has been put under criticism due to  
624 detectable model misspecification when tested on diverse empirical animal and plant  
625 datasets using posterior predictive simulations (Reid et al., 2014), it was important to  
626 evaluate the robustness of the Bayesian species delimitations with independent methods.  
627 We challenged the proposed species borders within the Smc by performing well-established  
628 population genetic analyses on our collection of environmental isolates from the sister  
629 lineages *S. maltophilia*, Smc1 and Smc2. We focused on detecting population genetic  
630 structure, estimating gene flow between the phylogenetically defined species, and  
631 identifying signatures of selection. Such data and evidence are predicted by current  
632 ecological models of bacterial speciation to reflect speciation events (Vinuesa et al.,  
633 2005b;Koeppel et al., 2008 ;Vos, 2011;Cadillo-Quiroz et al., 2012;Shapiro and Polz, 2014).

634 Current models of bacterial speciation suggest that groups of closely related strains that  
635 display some degree of resource partitioning, and consequently occupy different niches,  
636 will be affected by independent selective sweeps caused by the gain of a beneficial gene  
637 either by horizontal transfer or by adaptive mutation. These may sweep to fixation if  
638 recombination levels are low in relation to selection coefficients, or form so called  
639 “speciation islands or continents” in the genomes of highly recombining populations  
640 (Cadillo-Quiroz et al., 2012;Shapiro et al., 2012). Such (sympatric) populations are  
641 predicted to be discernable as sequence clusters that diverge from each other because of the  
642 fixation of different adaptive mutations. This leads to the formation of independent  
643 genetically and ecologically coherent units as gene flow between them gradually drops as  
644 they diverge by means of natural selection (Vos, 2011;Shapiro and Polz, 2014). We could  
645 show that the Mexican *S. maltophilia*, Smc1 and Smc2 lineages satisfy these predictions.  
646 The  $K_{ST}^*$  test statistic (Hudson et al., 1992) detected highly significant genetic  
647 differentiation between all pairs of these sympatric lineages based on DNA polymorphisms  
648 (Table 3). This is consistent with the results from the STRUCTURE analysis. Conversely,  
649 the number of migrants between these lineages was negligible, evidencing low levels of  
650 gene flow between them. Additionally, the “neutrality index” ( $NI$ ), and the results of the  
651 MK tests suggest that positive selection, rather than drift, is the force promoting divergence

652 between the lineages, which is in line with predictions from the adaptive divergence model  
653 (Vos, 2011). However, the latter interpretation needs to be considered cautiously, as the  
654 high relative rate of between-species non-synonymous substitutions observed could also be  
655 generated by within-species purifying selection to eliminate slightly deleterious mutations  
656 (Hughes, 2005; Hughes et al., 2008). The latter interpretation is consistent with the observed  
657 negative, but not significant Tajima's  $D$  values (Table 4). These are not likely to reflect a  
658 population expansion, given the non-significant  $p$ -values of the powerful  $R_2$  statistic for  
659 population growth, which is well suited for small sample sizes such as those of the Smc1  
660 and Smc2 lineages (Ramos-Onsins and Rozas, 2002). We could show that recombination is  
661 an important force, providing genetic cohesion to these lineages, with  $Rho/\theta$  estimates  
662 ranging from 1.11 in Smc1 to nearly 3 in *S. maltophilia*. Since recombination events are  
663 only detectable when a tract of multiple polymorphisms are introduced in a population, it is  
664 clear that most of the observed polymorphisms within the analyzed populations originate  
665 from recombination rather than point mutations. The high recombination levels detected  
666 within the *S. maltophilia* lineage suggests that speciation within this group is an ongoing,  
667 possibly not yet finished process, along a "spectrum" of speciation, resulting in "fuzzy"  
668 borders between the sub-lineages (Hanage et al., 2005; Shapiro et al., 2016). However, these  
669 can be already detected as phylogenetic and STRUCTURE clusters, even with the limited  
670 resolving power provided by the 7 gene MLST scheme used.

671 As predicted by the ecological speciation models recently developed for bacteria (Koepfel  
672 et al., 2008; Vos, 2011; Shapiro and Polz, 2014), the marked genetic differentiation detected  
673 between the sympatric *S. maltophilia*, Smc1 and Smc2 environmental populations is  
674 significantly associated with different habitat preferences, antibiotic susceptibility profiles  
675 and  $\beta$ -lactamase expression phenotypes. These attributes strongly suggest that these  
676 lineages have differentiated ecological niches. The significant differences in habitat  
677 preferences could provide some micro-geographic separation between the populations  
678 coexisting in the same river, which might partly explain the reduced gene flow measured  
679 between them, despite of being sister lineages, contributing to their genetic differentiation.  
680 Similar patterns have been reported for other aquatic microbes such as *Desulfohalobus*  
681 (Oakley et al., 2010), *Exiguobacterium* (Rebollar et al., 2012) and *Vibrio* (Shapiro et al.,  
682 2012; Friedman et al., 2013). Consequently, our results support the growing body of  
683 evidence pointing to niche partitioning as a major factor promoting evolutionary divergence  
684 between closely related sympatric prokaryotic populations, even when they exhibit high  
685 levels of recombination (Shapiro and Polz, 2014).

686 As noted before, *S. maltophilia* is well-known as an emergent opportunistic multidrug-  
687 resistant (MDR) nosocomial pathogen, causing increasing morbidity and mortality (Looney  
688 et al., 2009; Brooke, 2012). Comparative genomics and functional analyses have clearly  
689 established that the MDR or extensively drug-resistant (XDR) phenotype displayed by  
690 clinical isolates of this species is largely intrinsic, resulting from the expression of a  
691 combination of several types of efflux pumps (RND, MATE, MFS and ABC types) and  
692 diverse chromosomally-encoded antibiotic resistance genes [*aph(3')-IIIc*, *aac(6')-Iz* and  
693 *Smqnr*], including the metallo-beta-lactamase *blaL1* and the inducible Ambler class A beta-  
694 lactamase *blaL2* (Crossman et al., 2008; Brooke, 2014; García-León et al., 2014; Sanchez,  
695 2015; Youenou et al., 2015). However, contradictory results have been reported regarding  
696 the MDR status of environmental isolates of the Smc. For example, a recent ecological



697 study of a large collection isolates classified as *S. maltophilia* recovered from diverse  
698 agricultural soils in France and Tunisia concluded that they display a high diversity of  
699 antibiotic resistance profiles, expressing resistance against 1 to 12 antibiotics, with clinical  
700 and manure isolates expressing the highest numbers (Deredjian et al., 2016). These isolates  
701 were vaguely classified as *S. maltophilia* based on growth on the selective VIA isolation  
702 medium (Kerr et al., 1996) and PCR detection of the *smeD* gene (Pinot et al., 2011). We  
703 argue that the large phenotypic variance observed in that and similar studies result from the  
704 lack of proper species delimitation. This cannot be achieved with such coarse typing  
705 methods, most likely resulting in the lumping of multiple species into *S. maltophilia*. In  
706 contrast, in the present study we found a very strong statistical association between the  
707 MDR condition and metallo- $\beta$ -lactamase (MBL) production with the *S. maltophilia* lineage,  
708 whereas the sibling Smc1 and Smc2 genospecies were found to express on average  
709 resistance to < 3 antibiotic families (Figs. 4B and 4D and S13B), most strains not  
710 expressing any kind of  $\beta$ -lactamase, and none expressing MBLs (Fig. 5). Consequently,  
711 intrinsic MDR can only be assumed for the *S. maltophilia* strains of clinical and  
712 environmental origin.

713 In conclusion, the results presented here provide the first in depth and integrative molecular  
714 systematic, evolutionary genetic and ecological analysis of the genus *Stenotrophomonas*.  
715 The study demonstrates that both phylogenetic and population genetic approaches are  
716 necessary for robust delimitation of natural species borders in bacteria. Failure to properly  
717 delimit such lineages hinders downstream ecological and functional analysis of species.  
718 Comparative and population genomic studies are required to resolve pending issues  
719 regarding the speciation status of the sub-lineages within the *S. maltophilia*.

720

721 **5. Conflict of Interest Statement:** The authors declare that the research was conducted in  
722 the absence of any commercial or financial relationships that could be construed as a  
723 potential conflict of interest.

724

## 725 **6. Author Contributions**

726 All authors read and approved the manuscript. LEOS and PV conceived and designed the  
727 project. LEOS generated the collection of isolates, performed wet-lab experiments and  
728 analyzed resistance phenotypes. PV performed bioinformatics, statistical and evolutionary  
729 genetic analyses. PV wrote the manuscript.

730

## 731 **7. Funding**

732 This work is part of LEOS's PhD project in the Programa de Doctorado en Ciencias  
733 Biomédicas, Universidad Nacional Autónoma de México, and was supported by a PhD  
734 scholarship from Consejo Nacional de Ciencia y Tecnología (CONACyT-México) and  
735 student travel scholarships from PAEP-UNAM. We gratefully acknowledge financial

736 support obtained from CONACYT-México (grant 179133) and DGAPA-PAPIIT/UNAM  
737 (grant IN211814) to PV.

738

## 739 **8. Acknowledgements**

740 We gratefully thank Dr. Eria Rebollar and Dr. Claudia Silva for their critical reading of the  
741 manuscript. Javier Rivera Campos is acknowledged for technical support with wet-lab  
742 experiments. Antonio Trujillo from CCG-UNAM is thanked for support with field work.  
743 Don Juan Alvear Gutiérrez and Ing. Norberto Bahena are gratefully acknowledged for  
744 supporting our sampling at the natural parks Los Sauces and Las Estacas, respectively. José  
745 Alfredo Hernández and the UATI at CCG-UNAM are acknowledged for support with  
746 Linux server administration. Dr. Jesús Silva Sánchez from the INSP in Cuernavaca,  
747 Mexico, is gratefully thanked for his support throughout the work, particularly regarding  
748 the interpretation of disk-diffusion assays and for providing laboratory reagents.

749

## 750 **9. References**

- 751 Aagot, N., Nybroe, O., Nielsen, P., and Johnsen, K. (2001). An altered *Pseudomonas* diversity is  
752 recovered from soil by using nutrient-poor *Pseudomonas*-selective soil extract media.  
753 *Appl. Environ. Microbiol.* 67, 5233-5239. doi: 10.1128/AEM.67.11.5233-5239.2001.
- 754 Adamek, M., Overhage, J., Bathe, S., Winter, J., Fischer, R., and Schwartz, T. (2011). Genotyping of  
755 environmental and clinical *Stenotrophomonas maltophilia* isolates and their pathogenic  
756 potential. *PLoS One* 6, e27615. doi: 10.1371/journal.pone.0027615.
- 757 Apha (ed.). (2005). *Standard methods for the analysis of water and wastewater—Section 9222D.*  
758 *Thermotolerant (fecal) coliform membrane filter procedure.* Washington, D.C.: American  
759 Public Health Association.
- 760 Assih, E.A., Ouattara, A.S., Thierry, S., Cayol, J.L., Labat, M., and Macarie, H. (2002).  
761 *Stenotrophomonas acidaminiphila* sp. nov., a strictly aerobic bacterium isolated from an  
762 upflow anaerobic sludge blanket (UASB) reactor. *Int. J. Syst. Evol. Microbiol.* 52, 559-568.  
763 doi: 10.1099/00207713-52-2-559.
- 764 Aydin, Z., Marcussen, T., Ertekin, A.S., and Oxelman, B. (2014). Marginal likelihood estimate  
765 comparisons to obtain optimal species delimitations in *Silene* sect. *Cryptoneuræ*  
766 (*Caryophyllaceae*). *PLoS One* 9, e106990. 10.1371/journal.pone.0106990  
767 PONE-D-14-10584 [pii].
- 768 Baele, G., Lemey, P., Bedford, T., Rambaut, A., Suchard, M.A., and Alekseyenko, A.V. (2012).  
769 Improving the accuracy of demographic and molecular clock model comparison while  
770 accommodating phylogenetic uncertainty. *Mol Biol Evol* 29, 2157-2167. doi:  
771 10.1093/molbev/mss084.
- 772 Baele, G., Li, W.L., Drummond, A.J., Suchard, M.A., and Lemey, P. (2013). Accurate model selection  
773 of relaxed molecular clocks in bayesian phylogenetics. *Mol. Biol. Evol.* 30, 239-243. doi:  
774 10.1093/molbev/mss243.
- 775 Berg, G., and Martinez, J.L. (2015). Friends or foes: can we make a distinction between beneficial  
776 and harmful strains of the *Stenotrophomonas maltophilia* complex? *Front. Microbiol.* 6,  
777 241. doi: 10.3389/fmicb.2015.00241.



- 778 Berg, G., Roskot, N., and Smalla, K. (1999). Genotypic and phenotypic relationships between  
779 clinical and environmental isolates of *Stenotrophomonas maltophilia*. *J. Clin. Microbiol.* 37,  
780 3594-3600.
- 781 Bouckaert, R., Heled, J., Kuhnert, D., Vaughan, T., Wu, C.H., Xie, D., Suchard, M.A., Rambaut, A.,  
782 and Drummond, A.J. (2014). BEAST 2: a software platform for Bayesian evolutionary  
783 analysis. *PLoS Comput Biol* 10, e1003537. doi: 10.1371/journal.pcbi.1003537.
- 784 Bouckaert, R.R. (2010). DensiTree: making sense of sets of phylogenetic trees. *Bioinformatics* 26,  
785 1372-1373. doi: 10.1093/bioinformatics/btq110.
- 786 Brooke, J.S. (2012). *Stenotrophomonas maltophilia*: an emerging global opportunistic pathogen.  
787 *Clin. Microbiol. Rev.* 25, 2-41. doi: 10.1128/CMR.00019-11.
- 788 Brooke, J.S. (2014). New strategies against *Stenotrophomonas maltophilia*: a serious worldwide  
789 intrinsically drug-resistant opportunistic pathogen. *Expert Rev. Anti Infect. Ther.* 12, 1-4.  
790 doi: 10.1586/14787210.2014.864553.
- 791 Cadillo-Quiroz, H., Didelot, X., Held, N.L., Herrera, A., Darling, A., Reno, M.L., Krause, D.J., and  
792 Whitaker, R.J. (2012). Patterns of gene flow define species of thermophilic *Archaea*. *PLoS*  
793 *Biol.* 10, e1001265. doi: 10.1371/journal.pbio.1001265.
- 794 Clsi (2016). *Clinical and Laboratory Standards Institute (CLSI) Performance Standards for*  
795 *Antimicrobial susceptibility testing*. Wayne, Pennsylvania Clinical and Laboratory Standards  
796 Institute.
- 797 Coenye, T., Vanlaere, E., Falsen, E., and Vandamme, P. (2004). *Stenotrophomonas africana*  
798 Drancourt et al. 1997 is a later synonym of *Stenotrophomonas maltophilia* (Hugh 1981)  
799 Palleroni and Bradbury 1993. *Int. J. Syst. Evol. Microbiol.* 54, 1235-1237. doi:  
800 10.1099/ijs.0.63093-0.
- 801 Contreras-Moreira, B., Sachman-Ruiz, B., Figueroa-Palacios, I., and Vinuesa, P. (2009).  
802 primers4clades: a web server that uses phylogenetic trees to design lineage-specific PCR  
803 primers for metagenomic and diversity studies. *Nucleic Acids Res.* 37, W95-W100. gkp377  
804 doi: 10.1093/nar/gkp377.
- 805 Contreras-Moreira, B., and Vinuesa, P. (2013). GET\_HOMOLOGUES, a versatile software package  
806 for scalable and robust microbial pangenome analysis. *Appl. Environ. Microbiol.* 79, 7696-  
807 7701. doi: 10.1128/AEM.02411-13.
- 808 Cordero, O.X., and Polz, M.F. (2014). Explaining microbial genomic diversity in light of evolutionary  
809 ecology. *Nat. Rev. Microbiol.* 12, 263-273. doi: 10.1038/nrmicro3218.
- 810 Crossman, L.C., Gould, V.C., Dow, J.M., Vernikos, G.S., Okazaki, A., Sebahia, M., Saunders, D.,  
811 Arrowsmith, C., Carver, T., Peters, N., Adlem, E., Kerhornou, A., Lord, A., Murphy, L.,  
812 Seeger, K., Squares, R., Rutter, S., Quail, M.A., Rajandream, M.A., Harris, D., Churcher, C.,  
813 Bentley, S.D., Parkhill, J., Thomson, N.R., and Avison, M.B. (2008). The complete genome,  
814 comparative and functional analysis of *Stenotrophomonas maltophilia* reveals an organism  
815 heavily shielded by drug resistance determinants. *Genome Biol.* 9, R74. doi: 10.1186/gb-  
816 2008-9-4-r74.
- 817 Chang, Y.T., Lin, C.Y., Chen, Y.H., and Hsueh, P.R. (2015). Update on infections caused by  
818 *Stenotrophomonas maltophilia* with particular attention to resistance mechanisms and  
819 therapeutic options. *Front. Microbiol.* 6, 893. doi: 10.3389/fmicb.2015.00893.
- 820 Darriba, D., Taboada, G.L., Doallo, R., and Posada, D. (2012). jModelTest 2: more models, new  
821 heuristics and parallel computing. *Nat. Methods* 9, 772. nmeth.2109 [pii]  
822 10.1038/nmeth.2109.
- 823 Davenport, K.W., Daligault, H.E., Minogue, T.D., Broomall, S.M., Bruce, D.C., Chain, P.S., Coyne,  
824 S.R., Gibbons, H.S., Jaissle, J., Li, P.E., Rosenzweig, C.N., Scholz, M.B., and Johnson, S.L.

- 825 (2014). Complete genome sequence of *Stenotrophomonas maltophilia* type strain 810-2  
826 (ATCC 13637). *Genome Announc.* 2, 2/5/e00974-14. doi: 10.1128/genomeA.00974-14.
- 827 De La Bastide, M., and McCombie, W.R. (2007). Assembling genomic DNA sequences with PHRAP.  
828 *Curr. Protoc. Bioinformatics* Chapter 11, Unit11 14. doi: 10.1002/0471250953.bi1104s17.
- 829 Degnan, J.H., and Rosenberg, N.A. (2006). Discordance of species trees with their most likely gene  
830 trees. *PLoS Genet.* 2, e68.
- 831 Degnan, J.H., and Rosenberg, N.A. (2009). Gene tree discordance, phylogenetic inference and the  
832 multispecies coalescent. *Trends Ecol. Evol.* 24, 332-340. doi: 10.1016/j.tree.2009.01.009.
- 833 Deredjian, A., Alliot, N., Blanchard, L., Brothier, E., Anane, M., Cambier, P., Jolivet, C., Khelil, M.N.,  
834 Nazaret, S., Saby, N., Thioulouse, J., and Favre-Bonte, S. (2016). Occurrence of  
835 *Stenotrophomonas maltophilia* in agricultural soils and antibiotic resistance properties.  
836 *Res. Microbiol.* S0923-2508(16)00006-1 [pii]  
837 10.1016/j.resmic.2016.01.001.
- 838 Didelot, X., and Wilson, D.J. (2015). ClonalFrameML: efficient inference of recombination in whole  
839 bacterial genomes. *PLoS Comput. Biol.* 11, e1004041. doi: 10.1371/journal.pcbi.1004041.
- 840 Drummond, A.J., Ho, S.Y., Phillips, M.J., and Rambaut, A. (2006). Relaxed phylogenetics and dating  
841 with confidence. *PLoS Biol.* 4, e88. doi: 10.1371/journal.pbio.0040088.
- 842 Edwards, S.V., Liu, L., and Pearl, D.K. (2007). High-resolution species trees without concatenation.  
843 *Proc Natl Acad Sci U S A* 104, 5936-5941. doi: 10.1073/pnas.0607004104.
- 844 Evanno, G., Regnaut, S., and Goudet, J. (2005). Detecting the number of clusters of individuals  
845 using the software STRUCTURE: a simulation study. *Mol. Ecol.* 14, 2611-2620. doi:  
846 10.1111/j.1365-294X.2005.02553.x.
- 847 Falush, D., Stephens, M., and Pritchard, J.K. (2003). Inference of Population Structure Using  
848 Multilocus Genotype Data. Linked loci and correlated allele frequencies. *Genetics* 164,  
849 1567-1587.
- 850 Falush, D., Stephens, M., and Pritchard, J.K. (2007). Inference of population structure using  
851 multilocus genotype data: dominant markers and null alleles. *Mol. Ecol. Notes.* 7, 574-578.  
852 doi: 10.1111/j.1471-8286.2007.01758.x.
- 853 Friedman, J., Alm, E.J., and Shapiro, B.J. (2013). Sympatric speciation: when is it possible in  
854 bacteria? *PLoS One* 8, e53539. doi: 10.1371/journal.pone.0053539.
- 855 Fujita, M.K., Leache, A.D., Burbrink, F.T., McGuire, J.A., and Moritz, C. (2012). Coalescent-based  
856 species delimitation in an integrative taxonomy. *Trends Ecol. Evol.* 27, 480-488. doi:  
857 10.1016/j.tree.2012.04.012.
- 858 García-León, G., Salgado, F., Oliveros, J.C., Sánchez, M.B., and Martínez, J.L. (2014). Interplay  
859 between intrinsic and acquired resistance to quinolones in *Stenotrophomonas maltophilia*.  
860 *Environ. Microbiol.* 16, 1282-1296. 10.1111/1462-2920.12408.
- 861 Gevers, D., Cohan, F.M., Lawrence, J.G., Spratt, B.G., Coenye, T., Feil, E.J., Stackebrandt, E., Van De  
862 Peer, Y., Vandamme, P., Thompson, F.L., and Swings, J. (2005). Opinion: Re-evaluating  
863 prokaryotic species. *Nat. Rev. Microbiol.* 3, 733-739.
- 864 Glaeser, S.P., and Kampfer, P. (2015). Multilocus sequence analysis (MLSA) in prokaryotic  
865 taxonomy. *Syst. Appl. Microbiol.* 38, 237-245. doi: 10.1016/j.syapm.2015.03.007.
- 866 Grummer, J.A., Bryson, R.W., Jr., and Reeder, T.W. (2014). Species delimitation using Bayes  
867 factors: simulations and application to the *Sceloporus scalaris* species group (Squamata:  
868 Phrynosomatidae). *Syst. Biol.* 63, 119-133. syt069 [pii]  
869 10.1093/sysbio/syt069.
- 870 Guindon, S., Dufayard, J.F., Lefort, V., Anisimova, M., Hordijk, W., and Gascuel, O. (2010). New  
871 algorithms and methods to estimate maximum-likelihood phylogenies: assessing the  
872 performance of PhyML 3.0. *Syst. Biol.* 59, 307-321. doi: 10.1093/sysbio/syq010.

- 873 Hanage, W.P., Fraser, C., and Spratt, B.G. (2005). Fuzzy species among recombinogenic bacteria.  
874 *BMC Biol.* 3, 6.
- 875 Handa, Y., Tazato, N., Nagatsuka, Y., Koide, T., Kigawa, R., C., S., and Sugiyama, J. (2016).  
876 *Stenotrophomonas tumulicola* sp. nov., a major contaminant of the stone chamber interior  
877 in the Takamatsuzuka Tumulus. *Int. J. Syst. Evol. Microbiol.* 66, 1119–1124. doi:  
878 10.1099/ijsem.0.000843.
- 879 Hauben, L., Vauterin, L., Moore, E.R., Hoste, B., and Swings, J. (1999). Genomic diversity of the  
880 genus *Stenotrophomonas*. *Int. J. Syst. Bacteriol.* 49 Pt 4, 1749-1760. doi:  
881 10.1099/00207713-49-4-1749.
- 882 Hedge, J., and Wilson, D.J. (2014). Bacterial phylogenetic reconstruction from whole genomes is  
883 robust to recombination but demographic inference is not. *MBio* 5, e02158. mBio.02158-  
884 14. doi: 10.1128/mBio.02158-14.
- 885 Heled, J., and Drummond, A.J. (2010). Bayesian inference of species trees from multilocus data.  
886 *Mol. Biol. Evol.* 27, 570-580. doi: 10.1093/molbev/msp274.
- 887 Heylen, K., Vanparys, B., Peirsegaale, F., Lebbe, L., and De Vos, P. (2007). *Stenotrophomonas terrae*  
888 sp. nov. and *Stenotrophomonas humi* sp. nov., two nitrate-reducing bacteria isolated from  
889 soil. *Int. J. Syst. Evol. Microbiol.* 57, 2056-2061. doi: 10.1099/ijs.0.65044-0.
- 890 Hudson, R.R., Boos, D.D., and Kaplan, N.L. (1992). A statistical test for detecting geographic  
891 subdivision. *Mol. Biol. Evol.* 9, 138-151.
- 892 Hughes, A.L. (2005). Evidence for abundant slightly deleterious polymorphisms in bacterial  
893 populations. *Genetics* 169, 533-538. doi: 10.1534/genetics.104.036939.
- 894 Hughes, A.L., Friedman, R., Rivailler, P., and French, J.O. (2008). Synonymous and nonsynonymous  
895 polymorphisms versus divergences in bacterial genomes. *Mol. Biol. Evol.* 25, 2199-2209.  
896 doi: 10.1093/molbev/msn166.
- 897 Jawad, A., Hawkey, P.M., Heritage, J., and Snelling, A.M. (1994). Description of Leeds  
898 *Acinetobacter* Medium, a new selective and differential medium for isolation of clinically  
899 important *Acinetobacter* spp., and comparison with Herellea agar and Holton's agar. *J.*  
900 *Clin. Microbiol.* 32, 2353-2358.
- 901 Kaiser, O., Puhler, A., and Selbitschka, W. (2001). Phylogenetic Analysis of Microbial Diversity in  
902 the Rhizoplane of Oilseed Rape (*Brassica napus* cv. Westar) Employing Cultivation-  
903 Dependent and Cultivation-Independent Approaches. *Microb Ecol* 42, 136-149.
- 904 Kaiser, S., Biehler, K., and Jonas, D. (2009). A *Stenotrophomonas maltophilia* multilocus sequence  
905 typing scheme for inferring population structure. *J. Bacteriol.* 191, 2934-2943. doi:  
906 10.1128/JB.00892-08.
- 907 Kämpfer, P., and Glaeser, S.P. (2012). Prokaryotic taxonomy in the sequencing era--the polyphasic  
908 approach revisited. *Environ. Microbiol.* 14, 291-317. doi: 10.1111/j.1462-  
909 2920.2011.02615.x.
- 910 Kass, R.E., and Raftery, A.E. (1995). Bayes factors. *J. Am. Stat. Assoc.* 90, 773-795.
- 911 Kerr, K.G., Denton, M., Todd, N., Corps, C.M., Kumari, P., and Hawkey, P.M. (1996). A new selective  
912 differential medium for isolation of *Stenotrophomonas maltophilia*. *Eur. J. Clin. Microbiol.*  
913 *Infect. Dis.* 15, 607-610.
- 914 Koeppl, A., Perry, E.B., Sikorski, J., Krizanc, D., Warner, A., Ward, D.M., Rooney, A.P., Brambilla, E.,  
915 Connor, N., Ratcliff, R.M., Nevo, E., and Cohan, F.M. (2008). Identifying the fundamental  
916 units of bacterial diversity: a paradigm shift to incorporate ecology into bacterial  
917 systematics. *Proc. Natl. Acad. Sci. U. S. A.* 105, 2504-2509. doi: 10.1073/pnas.0712205105.
- 918 Kopelman, N.M., Mayzel, J., Jakobsson, M., Rosenberg, N.A., and Mayrose, I. (2015). Clumpak: a  
919 program for identifying clustering modes and packaging population structure inferences  
920 across K. *Mol. Ecol. Resour.* 15, 1179-1191. doi: 10.1111/1755-0998.12387.

- 921 Kubatko, L.S., and Degnan, J.H. (2007). Inconsistency of phylogenetic estimates from concatenated  
922 data under coalescence. *Syst. Biol.* 56, 17-24.
- 923 Lartillot, N., and Philippe, H. (2006). Computing Bayes factors using thermodynamic integration.  
924 *Syst. Biol.* 55, 195-207. doi: 10.1080/10635150500433722.
- 925 Lira, F., Hernandez, A., Belda, E., Sanchez, M.B., Moya, A., Silva, F.J., and Martinez, J.L. (2012).  
926 Whole-genome sequence of *Stenotrophomonas maltophilia* D457, a clinical isolate and a  
927 model strain. *J. Bacteriol.* 194, 3563-3564. doi: 10.1128/JB.00602-12.
- 928 Looney, W.J., Narita, M., and Muhlemann, K. (2009). *Stenotrophomonas maltophilia*: an emerging  
929 opportunist human pathogen. *Lancet Infect. Dis.* 9, 312-323. doi: 10.1016/S1473-  
930 3099(09)70083-0.
- 931 Mcdonald, J.H., and Kreitman, M. (1991). Adaptive protein evolution at the Adh locus in  
932 *Drosophila*. *Nature* 351, 652-654. doi: 10.1038/351652a0.
- 933 Oakley, B.B., Carbonero, F., Van Der Gast, C.J., Hawkins, R.J., and Purdy, K.J. (2010). Evolutionary  
934 divergence and biogeography of sympatric niche-differentiated bacterial populations.  
935 *ISME J.* 4, 488-497. doi: 10.1038/ismej.2009.146.
- 936 Palleroni, N.J., and Bradbury, J.F. (1993). *Stenotrophomonas*, a new bacterial genus for  
937 *Xanthomonas maltophilia* (Hugh 1980) Swings et al. 1983. *Int. J. Syst. Bacteriol.* 43, 606-  
938 609. doi: 10.1099/00207713-43-3-606.
- 939 Patil, P.P., Midha, S., Kumar, S., and Patil, P.B. (2016). Genome Sequence of Type Strains of Genus  
940 *Stenotrophomonas*. *Front. Microbiol.* 7, 309. doi: 10.3389/fmicb.2016.00309.
- 941 Pinot, C., Deredjian, A., Nazaret, S., Brothier, E., Cournoyer, B., Segonds, C., and Favre-Bonte, S.  
942 (2011). Identification of *Stenotrophomonas maltophilia* strains isolated from  
943 environmental and clinical samples: a rapid and efficient procedure. *J. Appl. Microbiol.*  
944 111, 1185-1193. doi: 10.1111/j.1365-2672.2011.05120.x.
- 945 Pritchard, J.K., Stephens, M., and Donnelly, P. (2000). Inference of population structure using  
946 multilocus genotype data. *Genetics* 155, 945-959.
- 947 R Development Core Team (2016). "R: A Language and Environment for Statistical Computing.  
948 <https://www.R-project.org/>." (Vienna, Austria).
- 949 Ramos-Onsins, S.E., and Rozas, J. (2002). Statistical properties of new neutrality tests against  
950 population growth. *Mol. Biol. Evol.* 19, 2092-2100.
- 951 Ramos, P.L., Van Trappen, S., Thompson, F.L., Rocha, R.C., Barbosa, H.R., De Vos, P., and Moreira-  
952 Filho, C.A. (2010). Screening for endophytic nitrogen-fixing bacteria in Brazilian sugar cane  
953 varieties used in organic farming and description of *Stenotrophomonas pavanii* sp. nov.  
954 *Int. J. Syst. Evol. Microbiol.* 61, 926-931. doi: 10.1099/ijs.0.019372-0.
- 955 Rand, D.M., and Kann, L.M. (1996). Excess amino acid polymorphism in mitochondrial DNA:  
956 contrasts among genes from *Drosophila*, mice, and humans. *Mol. Biol. Evol.* 13, 735-748.
- 957 Rannala, B., and Yang, Z. (2003). Bayes estimation of species divergence times and ancestral  
958 population sizes using DNA sequences from multiple loci. *Genetics* 164, 1645-1656.
- 959 Rebollar, E.A., Avitia, M., Eguiarte, L.E., Gonzalez-Gonzalez, A., Mora, L., Bonilla-Rosso, G., and  
960 Souza, V. (2012). Water-sediment niche differentiation in ancient marine lineages of  
961 *Exiguobacterium* endemic to the Cuatro Ciénegas Basin. *Environ. Microbiol.* 14, 2323-2333.  
962 doi: 10.1111/j.1462-2920.2012.02784.x.
- 963 Reid, N.M., Hird, S.M., Brown, J.M., Pelletier, T.A., Mcvay, J.D., Satler, J.D., and Carstens, B.C.  
964 (2014). Poor fit to the multispecies coalescent is widely detectable in empirical data. *Syst.*  
965 *Biol.* 63, 322-333. doi: 10.1093/sysbio/syt057.
- 966 Ribbeck-Busch, K., Roder, A., Hasse, D., De Boer, W., Martinez, J.L., Hagemann, M., and Berg, G.  
967 (2005). A molecular biological protocol to distinguish potentially human pathogenic



- 968 *Stenotrophomonas maltophilia* from plant-associated *Stenotrophomonas rhizophila*.  
969 *Environ. Microbiol.* 7, 1853-1858. EMI928 [pii]  
970 10.1111/j.1462-2920.2005.00928.x.
- 971 Rokas, A., Williams, B.L., King, N., and Carroll, S.B. (2003). Genome-scale approaches to resolving  
972 incongruence in molecular phylogenies. *Nature* 425, 798-804.
- 973 Rosenberg, N.A. (2013). Discordance of species trees with their most likely gene trees: a unifying  
974 principle. *Mol. Biol. Evol.* 30, 2709-2713. doi: 10.1093/molbev/mst160.
- 975 Rozas, J., Sánchez-Delbarrio, J.C., Messeguer, X., and Rozas, R. (2003). DnaSP, DNA polymorphism  
976 analyses by the coalescent and other methods. *Bioinformatics* 19, 2496-2497.
- 977 Ryan, R.P., Monchy, S., Cardinale, M., Taghavi, S., Crossman, L., Avison, M.B., Berg, G., Van Der  
978 Lelie, D., and Dow, J.M. (2009). The versatility and adaptation of bacteria from the genus  
979 *Stenotrophomonas*. *Nat. Rev. Microbiol.* 7, 514-525. doi: 10.1038/nrmicro2163.
- 980 Sanchez, M.B. (2015). Antibiotic resistance in the opportunistic pathogen *Stenotrophomonas*  
981 *maltophilia*. *Front. Microbiol.* 6, 658. doi: 10.3389/fmicb.2015.00658.
- 982 Shapiro, B.J., Friedman, J., Cordero, O.X., Preheim, S.P., Timberlake, S.C., Szabo, G., Polz, M.F., and  
983 Alm, E.J. (2012). Population genomics of early events in the ecological differentiation of  
984 bacteria. *Science* 336, 48-51. doi: 10.1126/science.1218198.
- 985 Shapiro, B.J., Leducq, J.B., and Mallet, J. (2016). What Is Speciation? *PLoS Genet.* 12, e1005860.  
986 doi: 10.1371/journal.pgen.1005860.
- 987 Shapiro, B.J., and Polz, M.F. (2014). Ordering microbial diversity into ecologically and genetically  
988 cohesive units. *Trends Microbiol.* 22, 235-247. doi: 10.1016/j.tim.2014.02.006.
- 989 Song, S., Liu, L., Edwards, S.V., and Wu, S. (2012). Resolving conflict in eutherian mammal  
990 phylogeny using phylogenomics and the multispecies coalescent model. *Proc. Natl. Acad.*  
991 *Sci. U. S. A.* 109, 14942-14947. doi: 10.1073/pnas.1211733109.
- 992 Svensson-Stadler, L.A., Mihaylova, S.A., and Moore, E.R. (2011). *Stenotrophomonas* interspecies  
993 differentiation and identification by *gyrB* sequence analysis. *FEMS Microbiol. Lett.* 327, 15-  
994 24. doi: 10.1111/j.1574-6968.2011.02452.x.
- 995 Ultee, A., Souvatzi, N., Maniadi, K., and König, H. (2004). Identification of the culturable and  
996 nonculturable bacterial population in ground water of a municipal water supply in  
997 Germany. *J. Appl. Microbiol.* 96, 560-568.
- 998 Usepa (2002). "Method 1603: *Escherichia coli* (*E.coli*) in Water by Membrane Filtration Using  
999 Modified membrane-Thermotolerant *Escherichia coli* Agar (Modified mTEC) (September  
1000 2002)"
- 1001 Van Den Mooter, M., and Swings, J. (1990). Numerical analysis of 295 phenotypic features of 266  
1002 *Xanthomonas* strain and related strains and an improved taxonomy of the genus. *Int. J.*  
1003 *Syst. Bacteriol.* 40, 348-369.
- 1004 Vasileuskaya-Schulz, Z., Kaiser, S., Maier, T., Kostrzewa, M., and Jonas, D. (2011). Delineation of  
1005 *Stenotrophomonas* spp. by multi-locus sequence analysis and MALDI-TOF mass  
1006 spectrometry. *Syst. Appl. Microbiol.* 34, 35-39. doi: 10.1016/j.syapm.2010.11.011.
- 1007 Vinuesa, P. (2010). "Multilocus Sequence Analysis and Bacterial Species Phylogeny Estimation," in  
1008 *Molecular Phylogeny of Microorganisms*, eds. A. Oren & R.T. Papke. Caister Academic  
1009 Press), 41-64.
- 1010 Vinuesa, P., and Ochoa-Sánchez, L.E. (2015). Complete Genome Sequencing of *Stenotrophomonas*  
1011 *acidaminiphila* ZAC14D2\_NAIMI4\_2, a Multidrug-Resistant Strain Isolated from Sediments  
1012 of a Polluted River in Mexico, Uncovers New Antibiotic Resistance Genes and a Novel  
1013 Class-II Lasso Peptide Biosynthesis Gene Cluster. *Genome Announc.* 3, e01433-01415. doi:  
1014 10.1128/genomeA.01433-15.

- 1015 Vinuesa, P., Rojas-Jimenez, K., Contreras-Moreira, B., Mahna, S.K., Prasad, B.N., Moe, H., Selvaraju,  
1016 S.B., Thierfelder, H., and Werner, D. (2008). Multilocus sequence analysis for assessment  
1017 of the biogeography and evolutionary genetics of four *Bradyrhizobium* species that  
1018 nodulate soybeans on the Asiatic continent. *Appl. Environ. Microbiol.* 74, 6987-6996.
- 1019 Vinuesa, P., Silva, C., Lorite, M.J., Izaguirre-Mayoral, M.L., Bedmar, E.J., and Martínez-Romero, E.  
1020 (2005a). Molecular systematics of rhizobia based on maximum likelihood and Bayesian  
1021 phylogenies inferred from *rrs*, *atpD*, *recA* and *nifH* sequences, and their use in the  
1022 classification of *Sesbania* microsymbionts from Venezuelan wetlands. *Syst. Appl.  
1023 Microbiol.* 28, 702-716.
- 1024 Vinuesa, P., Silva, C., Werner, D., and Martínez-Romero, E. (2005b). Population genetics and  
1025 phylogenetic inference in bacterial molecular systematics: the roles of migration and  
1026 recombination in *Bradyrhizobium* species cohesion and delineation. *Mol. Phylogenet. Evol.*  
1027 34, 29-54.
- 1028 Vos, M. (2011). A species concept for bacteria based on adaptive divergence. *Trends Microbiol.* 19,  
1029 1-7. S0966-842X(10)00187-3. doi: 10.1016/j.tim.2010.10.003.
- 1030 Weisburg, W.G., Barns, S.M., Pelletie, D.A., and Lane, D.J. (1991). 16S ribosomal DNA amplification  
1031 for phylogenetic study. *J. Bacteriol.* 173, 697-703.
- 1032 Wilcox, R. (2016). *Introduction to Robust Estimation and Hypothesis Testing, 4th ed.* New York:  
1033 Academic Press.
- 1034 Wu, M., and Eisen, J.A. (2008). A simple, fast, and accurate method of phylogenomic inference.  
1035 *Genome Biol.* 9, R151.
- 1036 Yi, H., Srinivasan, S., and Kim, M.K. (2010). *Stenotrophomonas panacihumi* sp. nov., isolated from  
1037 soil of a ginseng field. *J. Microbiol.* 48, 30-35. doi: 10.1007/s12275-010-0006-0.
- 1038 Youenou, B., Favre-Bonte, S., Bodilis, J., Brothier, E., Dubost, A., Muller, D., and Nazaret, S. (2015).  
1039 Comparative Genomics of Environmental and Clinical *Stenotrophomonas maltophilia*  
1040 Strains with Different Antibiotic Resistance Profiles. *Genome Biol. Evol.* 7, 2484-2505.  
1041 evv161. doi: 10.1093/gbe/evv161.
- 1042 Zhu, B., Liu, H., Tian, W.X., Fan, X.Y., Li, B., Zhou, X.P., Jin, G.L., and Xie, G.L. (2012). Genome  
1043 sequence of *Stenotrophomonas maltophilia* RR-10, isolated as an endophyte from rice  
1044 root. *J. Bacteriol.* 194, 1280-1281. doi: 10.1128/JB.06702-11.
- 1045  
1046  
1047



1048 **Table 1.** Sampling sites for this study in Morelos, Mexico and pollution level based on  
 1049 counts of thermotolerant fecal coliforms (TTFCs) and thermotolerant *E. coli* (TTEc)  
 1050 colony forming units (cfu/100 ml) measured in the water column.

| River    | Site name                 | code | coordinates <sup>a</sup>  | TTFCs <sup>b</sup> | TTEc <sup>c</sup> | Pol.level <sup>c</sup> |
|----------|---------------------------|------|---------------------------|--------------------|-------------------|------------------------|
| Apatlaco | Temixco                   | TEX  | 18°51'14.4"N 99°13'20.4"W | 5.66e5             | 3.6e5             | H                      |
| Apatlaco | Zacatepec                 | ZAC  | 18°38'23.4"N 99°11'44.5"W | 5.34e5             | 3.2e5             | H                      |
| Sauces   | Los Sauces (river)        | SAU  | 18°41'50.0"N 99°07'45.7"W | 240                | 97                | L                      |
| Sauces   | Los Sauces (flooded soil) | SAUr | 18°41'50.0"N 99°07'45.7"W | 966                | 166               | L                      |
| Estacas  | Las Estacas               | EST  | 18°43'57.5"N 99°06'48.3"W | 83                 | 17                | L                      |
| Yautepec | Bonifacio García          | YAU  | 18°43'24.0"N 99°06'53.3"W | 1.96e3             | 833               | I                      |

1051 <sup>a</sup>See supplementary Figure S1 for maps and pictures of the sampling sites.

1052 <sup>b</sup>Thermo-tolerant fecal coliform counts were performed on mFC agar using the membrane-  
 1053 filtration method.

1054 <sup>c</sup>Thermo-tolerant *E. coli* counts were performed on mTEC agar using the membrane-  
 1055 filtration method.

1056 <sup>d</sup>Pollution level, coded as high (H > 1000), intermediate (200 < I < 1000) and low (L <  
 1057 200), based on the colony forming units (cfu) of thermo-tolerant *E. coli*.

1058

1059

1060

1061 **Table 2.** Bayes factor (BF) analysis for 5 species delimitation hypotheses within the *S.*  
 1062 *maltophilia* complex, plus genogroups #8 and #10, based on marginal likelihoods computed  
 1063 for each hypothesis by path sampling (see methods).

| Species model <sup>a</sup> | marginal lnL estimate | Model rank | ln-BF <sup>b</sup> (vs. best) | ln-BF <sup>c</sup> (vs. previous) |
|----------------------------|-----------------------|------------|-------------------------------|-----------------------------------|
| split1                     | -31347.16515          | 1 (best)   | NA                            | NA                                |
| lump_Smal+Smc1             | -31384.34206          | 2          | 4.308835**                    | 4.308835** (2 vs. 1)              |
| lump_Smal+Smc12            | -31498.71633          | 3          | 5.714071***                   | 5.432623*** (3 vs. 2)             |
| lump_Smal+Smc123           | -31521.18269          | 4          | 5.852303***                   | 3.805166** (4 vs. 3)              |
| lump_Smal+Smc1234          | -31593.24923          | 5          | 6.19882***                    | 4.970737** (5 vs. 4)              |

1064 <sup>a</sup>The best (split1) model assumes that genogroup #10 is a sister clade of *S. rhizophila* (Fig.  
 1065 1A) and splits the Smc into *S. maltophilia* (Smal) and four additional species clades (Smc1-  
 1066 Smc4), according to Fig. 1B. The following models consecutively lump the *S. maltophilia*  
 1067 clade with the Smc1-Smc4 clades, with lump\_ *S. maltophilia*+Smc1234 representing the  
 1068 whole *S. maltophilia* complex as a single species (Figs 1A and 1B). The marginal lnL for  
 1069 the Lump\_clades\_#8+#10 model is -31465.00904, resulting in a ln-BF = 5.462508\*\*\*  
 1070 when compared against the split1 (best) model.

1071 <sup>b</sup>The ln-Bayes factors are computed based on the marginal likelihood estimates ln-BF =  
 1072 log(2(M<sub>0</sub>-M<sub>1</sub>)), where M<sub>0</sub> is the best model (model 1), which is compared against each of  
 1073 the following ones. \*indicates positive support [ln(BF) is n the range of 1.1-3]; \*\* indicates  
 1074 strong support [ln(BF) is n the range of 3-5]; \*\*\* indicates overwhelming support [ln(BF) >  
 1075 5].

1076 <sup>c</sup>The ln-Bayes factors are computed as described above, but involve M<sub>0</sub> as the model  
 1077 preceding model M<sub>1</sub> from the ranked model list.

1078 NA = not applicable.

1079

1080  
1081  
1082  
1083  
1084  
1085  
1086  
1087  
1088  
1089  
1090

**Table 3.** McDonald-Kreitman (MK) neutrality tests, genetic differentiation and gene flow estimates between environmental isolates of the Smc1, Smc2 and *S. maltophilia* (Smal) lineages of the *S. maltophilia* complex recovered from Mexican rivers based on the concatenated dataset (3591 sites).  $D_{xy}$  is the interpopulation genetic distance.  $K_{ST}^*$  is Hudson's index of population genetic differentiation.  $F_{ST}$  is the fixation index.  $N_m$  represents the number of migrants per generation.  $NI$  is the neutrality index and  $G$  is the likelihood ratio or  $G$ -test of independence.

| Lineages  | No. Fixed diffs. | $D_{xy}$ | $K_{ST}^*$ | $F_{ST}$ | $N_m$ | $NI$  | $G$   | $p$ -value |
|-----------|------------------|----------|------------|----------|-------|-------|-------|------------|
| Smc1-Smc2 | 45               | 0.04616  | 0.13791*** | 0.57819  | 0.36  | 0.328 | 6.709 | 0.00959**  |
| Smc1-Smal | 9                | 0.04542  | 0.06654*** | 0.43022  | 0.66  | 0.247 | 3.133 | 0.07672    |
| Smc2-Smal | 28               | 0.04924  | 0.09508*** | 0.59384  | 0.34  | 0.312 | 6.020 | 0.02515*   |

1091 <sup>a</sup> The significance of the estimated statistic was computed using the permutation test with  
1092 10000 iterations.

1093 <sup>b</sup>  $p$ -values for the  $G$ -test.

1094  
1095  
1096  
1097  
1098  
1099  
1100

**Table 4.** Descriptive statistics of DNA polymorphisms, neutrality and population growth tests for environmental isolates of the Smc1, Smc2, *S. maltophilia* (Smal) and *S. terrae* (Sterr) lineages recovered from Mexican rivers based on the concatenated dataset (3591 sites). The  $p$ -values for the  $R_2$  statistic were estimated using 10000 coalescent simulations assuming an intermediate level of recombination.

| Species | No. Seqs | $S$ | $Eta$ | $\pi$   | $h/Hd$   | $Theta / site$ | $Tajima's D$  | $R_2$  | $p$ -value |
|---------|----------|-----|-------|---------|----------|----------------|---------------|--------|------------|
| Smc1    | 11       | 258 | 280   | 0.02502 | 9/0.945  | 0.02662        | -0.29156 (NS) | 0.1390 | 0.45       |
| Smc2    | 15       | 173 | 185   | 0.01393 | 14/0.990 | 0.01584        | -0.45427 (NS) | 0.1199 | 0.19       |
| Smal    | 51       | 500 | 560   | 0.02652 | 33/0.929 | 0.03470        | -0.85761 (NS) | 0.0903 | 0.17       |
| Sterr   | 10       | 318 | 328   | 0.02388 | 7/0.067  | 0.04455        | -1.30647 (NS) | 0.1482 | 0.49       |

1101  
1102  
1103  
1104  
1105  
1106  
1107  
1108  
1109

**Table 5.** Recombination estimates for environmental isolates of the Smc1, Smc2, *S. maltophilia* (Smal) and *S. terrae* (Sterr) lineages recovered from Mexican rivers based on the concatenated dataset (3591 sites). The figures indicate the posterior mean and their variances are shown in parentheses.

| Lineages | $R/theta$         | $1/delta$             | $nu$                  |
|----------|-------------------|-----------------------|-----------------------|
| Smc1     | 1.10774 (0.07076) | 0.0006789 (3.213e-08) | 0.0152529 (7.570e-07) |
| Smc2     | 1.89989 (0.12028) | 0.0009080 (3.121e-08) | 0.00864951 (3.081e-7) |
| Smal     | 2.95326 (0.10044) | 0.0010379 (1.302e-08) | 0.0129774 (1.648e-7)  |
| Sterr    | 0.87233 (0.05113) | 0.0021663 (3.443e-07) | 0.0650391 (1.2279e-5) |

1110  
1111  
1112

## 1113 **Figure legends**

1114

1115 **Figure 1.** Maximum likelihood multilocus phylogeny of the genus *Stenotrophomonas* and  
1116 species delimitation hypotheses. The tree shown corresponds to the best one found  
1117 out of 1001 searches under the GTR+G model and BEST moves, using the  
1118 concatenated alignment (7-loci) for 194 non-redundant STs, containing all validly  
1119 described species of the genus except for *S. tumulicola*, additional key reference  
1120 strains and 63 haplotypes from the 108 Mexican environmental isolates analyzed in  
1121 this study. A) The *S. maltophilia* complex (Smc) clade is collapsed in this tree. B)  
1122 The Smc clade is displayed, collapsing the clades visible in B. Clades are labeled  
1123 using the A-E codes of Kaiser et al. (2009) and #1-#10 of Hauben et al. (1999) for  
1124 easy cross-reference. The shaded areas indicate species assignment hypotheses  
1125 specifically evaluated in this study by the multispecies coalescent using Bayes  
1126 factors and by population genetics analyses (Tables 2 and 3). The combined  
1127 evidence of both approaches reveals that the Smc complex should be split into *S.*  
1128 *maltophilia* and four new species lineages: Smc1, Smc2, Smc3 and Smc4 (Fig. 1B).  
1129 We also show (Fig 1A) that genotype #10 represents a non-described species that  
1130 should not be merged with *S. rhizophila* clade #8 (Table 2). Type and other key  
1131 reference strains are highlighted in bold-face. The bar indicates the number of  
1132 expected substitutions per site under the GTR+G model.

1133

1134 **Figure 2.** Optimally aligned STRUCTURE barplots for 20 replicate runs executed for  $K =$   
1135 3 to  $K = 6$  generated with CLUMPAK, showing the population genetic structure of  
1136 the Mexican isolates from the Smc classified as *S. maltophilia* (Smalt) Smc1 (Sm1)  
1137 and Smc2 (Sm2). The Sm4 cluster corresponds to Smc4 sequences from  
1138 pubmlst.org, included in the analysis as an outgroup to the Mexican Smc strains  
1139 (see Fig. 1B).

1140

1141

1142

1143 **Figure 3.** Multivariate correspondence analysis (MCA) factor –individuals biplot map,  
1144 summarizing the associations between antibiotic resistance profiles,  $\beta$ -lactamase  
1145 production phenotypes and species assignments. The state of 17 active variables  
1146 (IMP=imipenem, MER=meropenem, CAZ=ceftazidime,  
1147 CAZ.CLA=ceftazidime/clavulanate, FEP=cefepime, ATM=aztreonam,  
1148 b.lactamase, species, Tm.Cb=trimethoprim+carbenicillin,  
1149 CL=chloramphenicol, SM=streptomycin, GM=gentamicin, KA=kanamycin,  
1150 P.T=piperacillin/tazobactam, NAL=nalidixic acid,  
1151 CIP4=ciprofloxacin, TET=tetracycline) and 4 supplementary categorical  
1152 variables [Habitat, Env\_Qual (environmental quality), Isol\_Med  
1153 (isolation medium), MDR] are shown, sorted along the first two dimensions that  
1154 together explain 45.3% of the total variance. Some variables like CTX4  
1155 (cefotaxime) were excluded, due to lack of variability in the observed states.  
1156 Species name abbreviations are as follows: malt = *S. maltophilia*; Sm1 = Smc1;  
1157 Sm2 = Smc2; terr = *S. terrae*.

1158

1159

1160 **Figure 4.** Panels A, B, E and F display violin and boxplots for the raw count data of  
1161 number of resistances to individual antimicrobials (NumR) and distinct drug  
1162 families (NumFam) for Mexican environmental isolates. The big white dot shows  
1163 the median and the smaller blue one the mean of the distribution of individual  
1164 observations, represented as small open circles. Yellow dots indicate outlier data  
1165 points. Panels C, D, G and H show meanplots for NumR and NumFam (see labels  
1166 on the ordinates) for 20% trimmed means and 95% confidence intervals estimated  
1167 by non-parametric bootstrap ( $nboot = 1000$ ). Upper row panels (A-D) correspond to  
1168 analyses for the Mexican isolates classified in the four species/lineages indicated on  
1169 the x-axes. Lower panels (E-H) correspond to Mexican *S. maltophilia* isolates  
1170 recovered from high and low pollution sites, based on the criteria indicated on Table  
1171 1. The 4 *S. maltophilia* isolates recovered from sites with intermediate  
1172 contamination level were excluded, as only populations of organisms with > 10  
1173 isolates were considered. Species codes are as defined in Fig. 3.  
1174

1175 **Figure 5.** Two-way association plot for the categorical variables species and  $\beta$ -lactamase  
1176 production phenotype and *Stenotrophomonas* species containing > 10 Mexican  
1177 environmental isolates. The bars on the plot represent the Pearson residuals, the  
1178 color code and the height of the bars denote the significance level and magnitude of  
1179 the residuals, and their widths are proportional to the sample size. The  $\beta$ -lactamase  
1180 codes are as follows: 0 = no  $\beta$ -lactamase activity detected; CI = clavulanate-  
1181 inducible class A or class C (AmpC) cephalosporinase; CI\_M = clavulanate-  
1182 inducible cephalosporinase plus metallo  $\beta$ -lactamase (MBL); E = extended-  
1183 spectrum  $\beta$ -lactamase (ESBL); E\_M = ESBL plus MBL; M = MBL. Species codes  
1184 are as defined in Fig. 3.  
1185

1186  
1187 **Figure 6.** Four-way association plot showing the results of multiway-chi-square analysis  
1188 for the categorical variables species (abbreviations as defined in Fig. 3), habitat (W  
1189 = water column; S = flooded soil; D = sediment), isolation medium (N = NAA; MK  
1190 = MacConkey; LE = Leed's Medium) and pollution level (H = high; L = low; M =  
1191 intermediate, based on counts of thermotolerant coliforms and *E. coli*, as defined in  
1192 Table 1), using Friendly's residual coloring scheme to highlight the significant  
1193 associations. Species codes are as defined in Fig. 3. The bars on the plot represent  
1194 the Pearson residuals, the color code and the height of the bars denote the  
1195 significance level and magnitude of the residuals, and their widths are proportional  
1196 to the sample size.  
1197  
1198

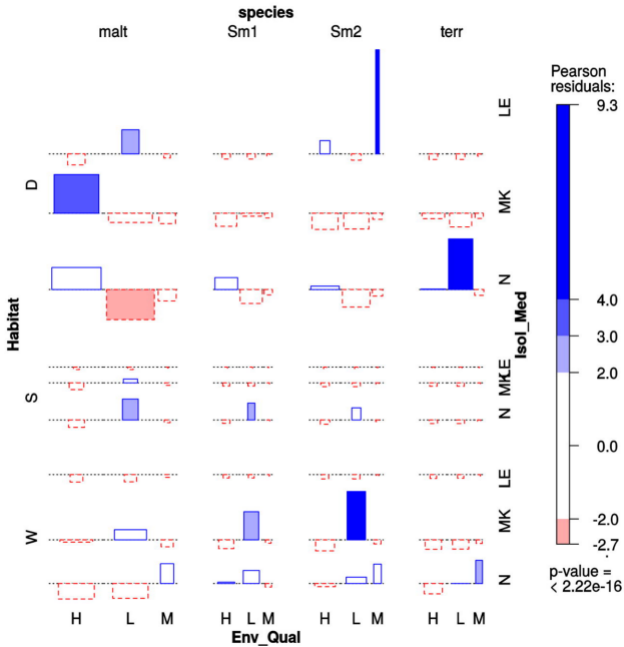



**b.lactamase**

0

CI

CI\_M

E

E\_M

M

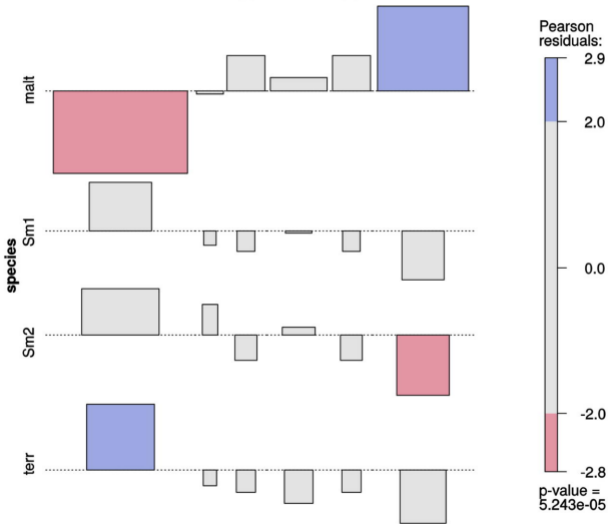Pearson  
residuals:

2.9

2.0

0.0

-2.0

-2.8

p-value =  
5.243e-05

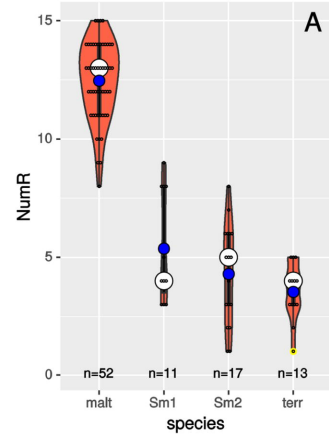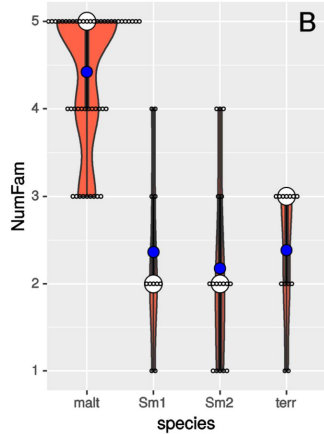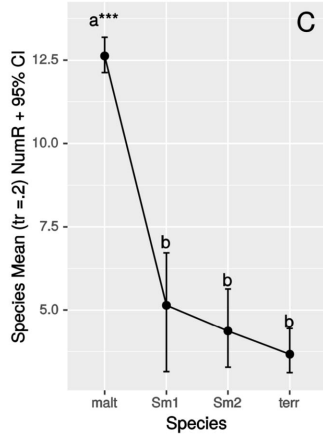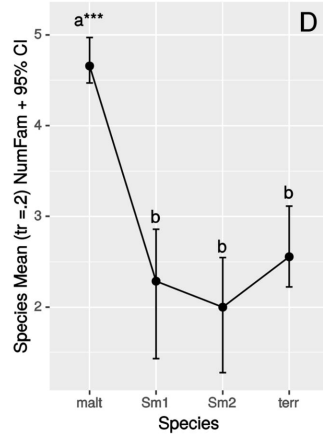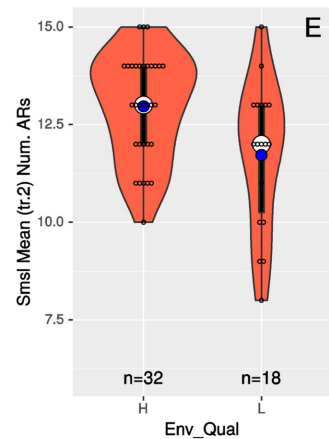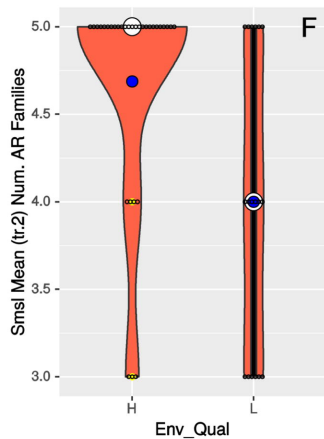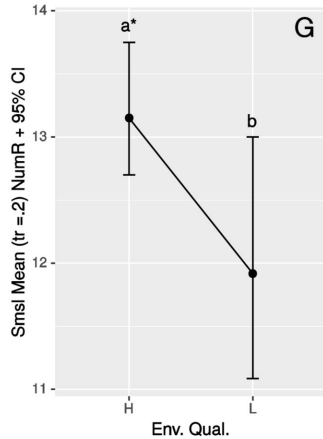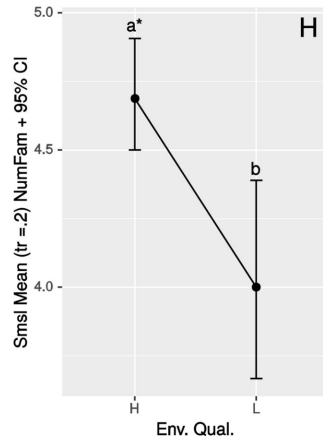

B)

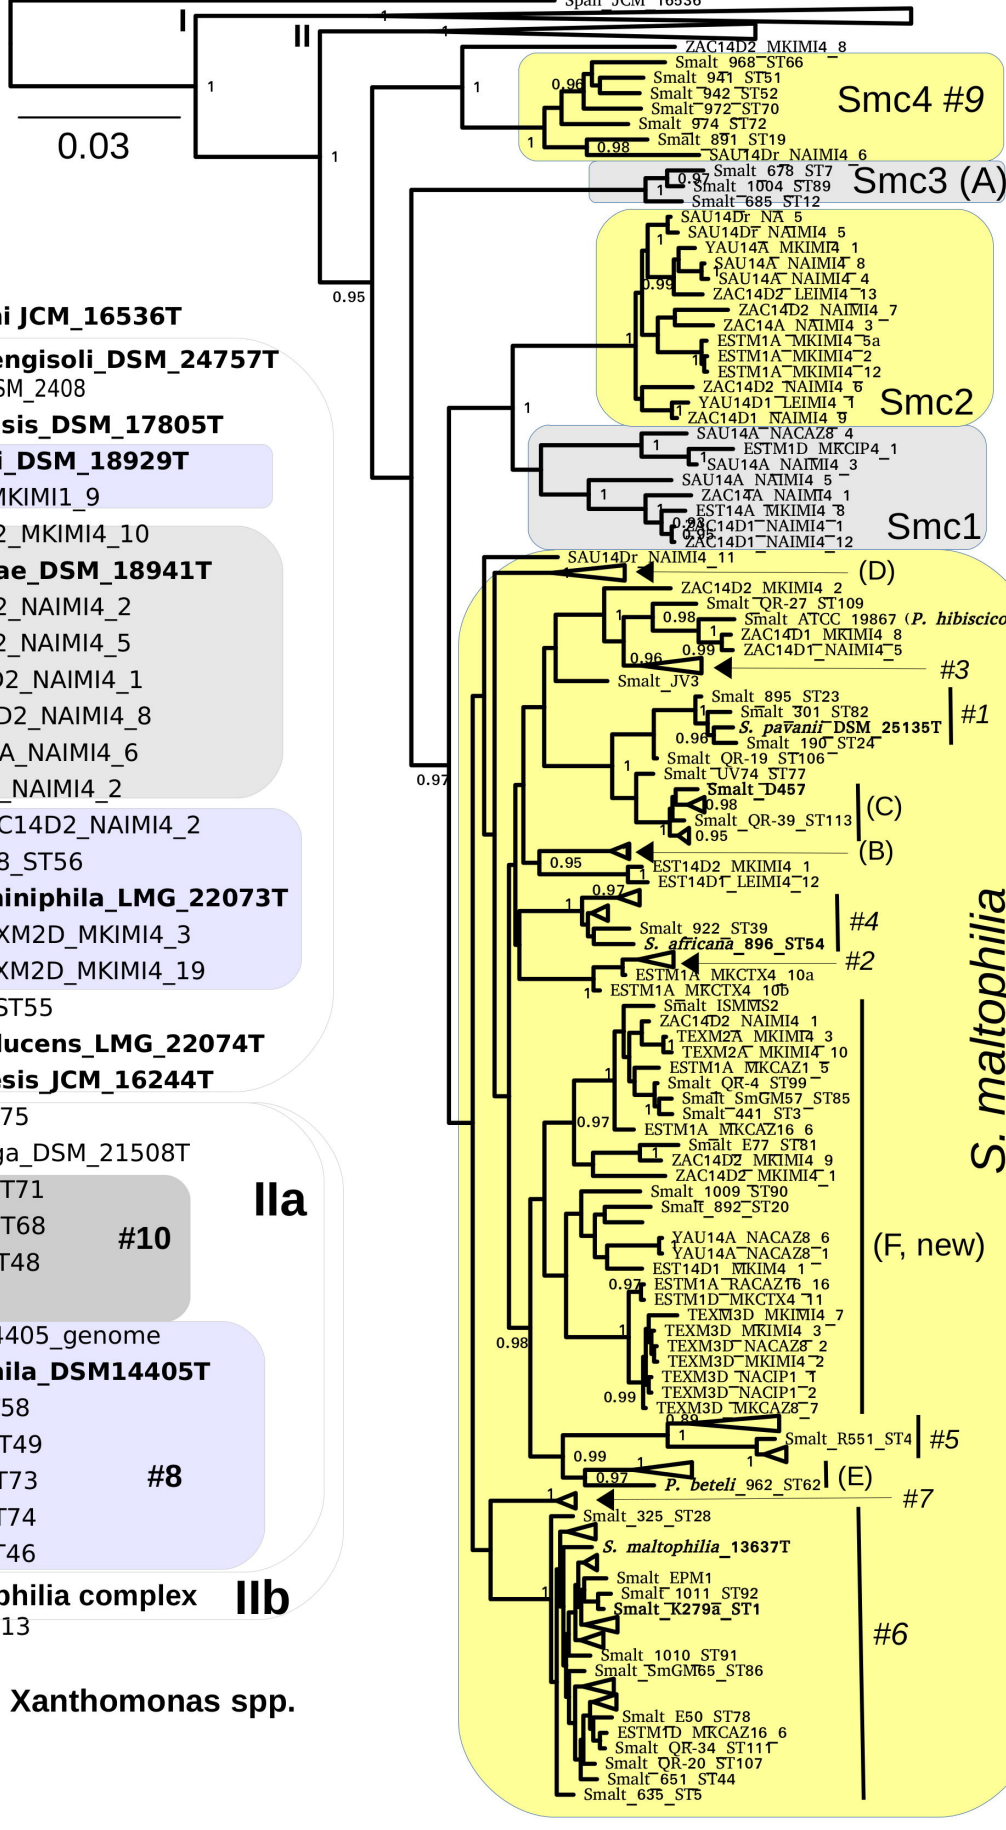

A)

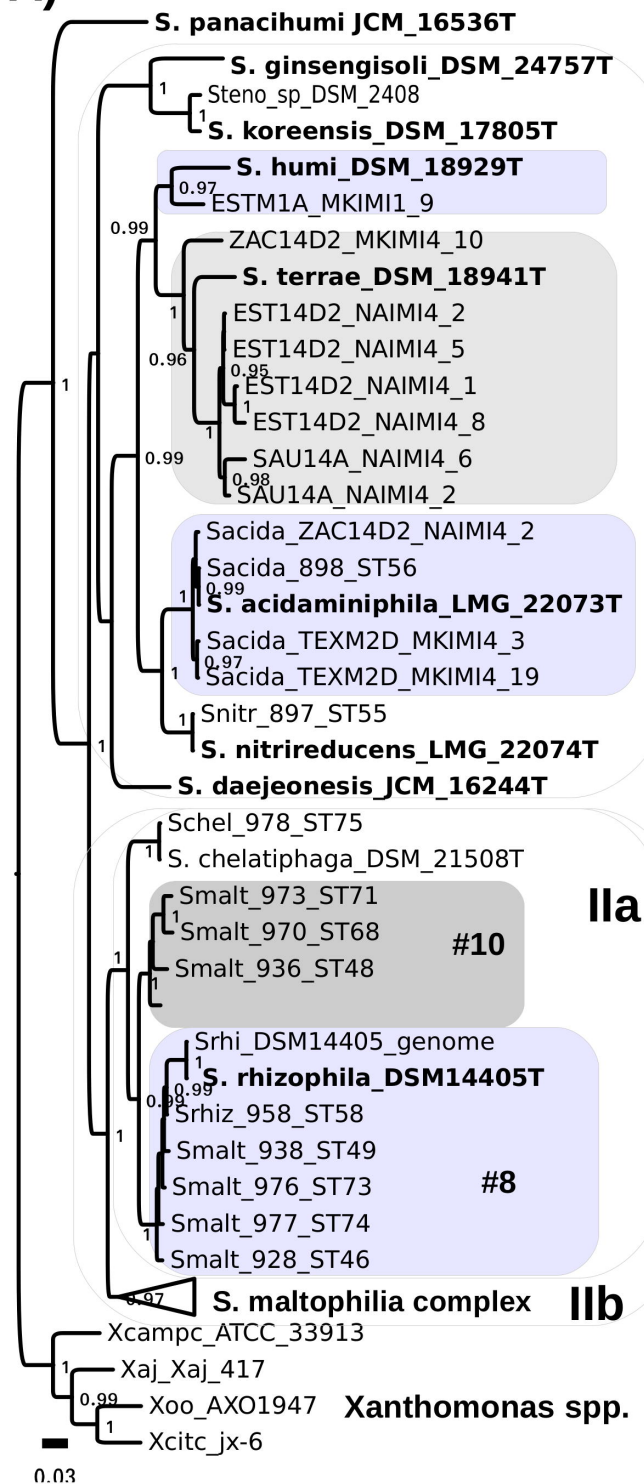*S. maltophilia*

Smc4 #9

Smc3 (A)

Smc2

Smc1

(D)

#3

#1

(C)

(B)

#4

#2

(F, new)

#5

(E)

#7

#6

#10

#8

IIa

IIb

Xanthomonas spp.

$K = 3$

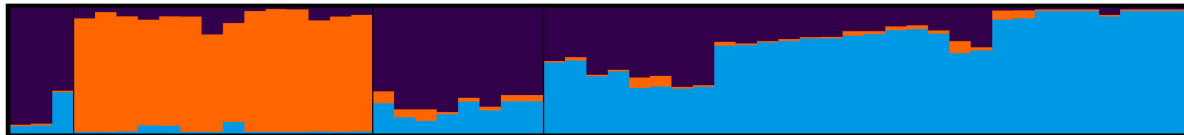

$K = 4$

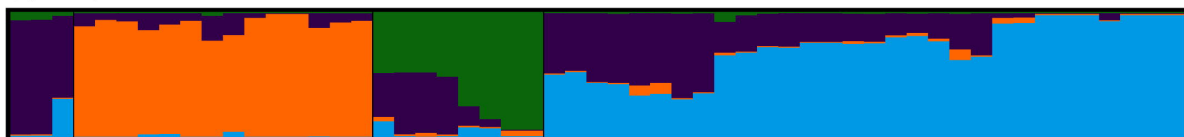

$K = 5$

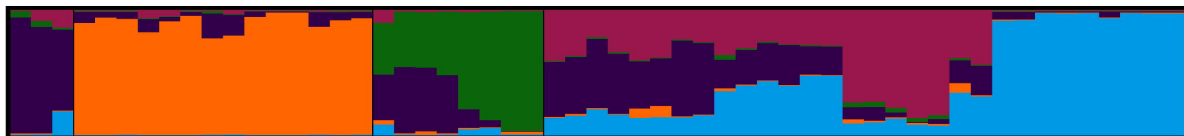

$K = 6$

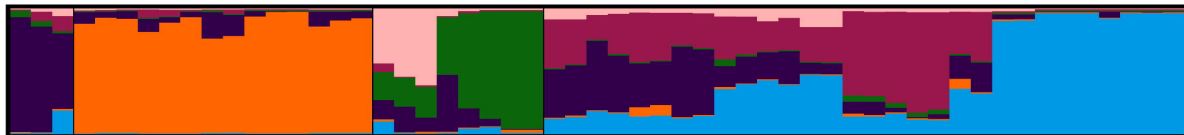

Smc4      Smc2      Smc1      *S. maltophilia*

# MCA factor map - Biplot

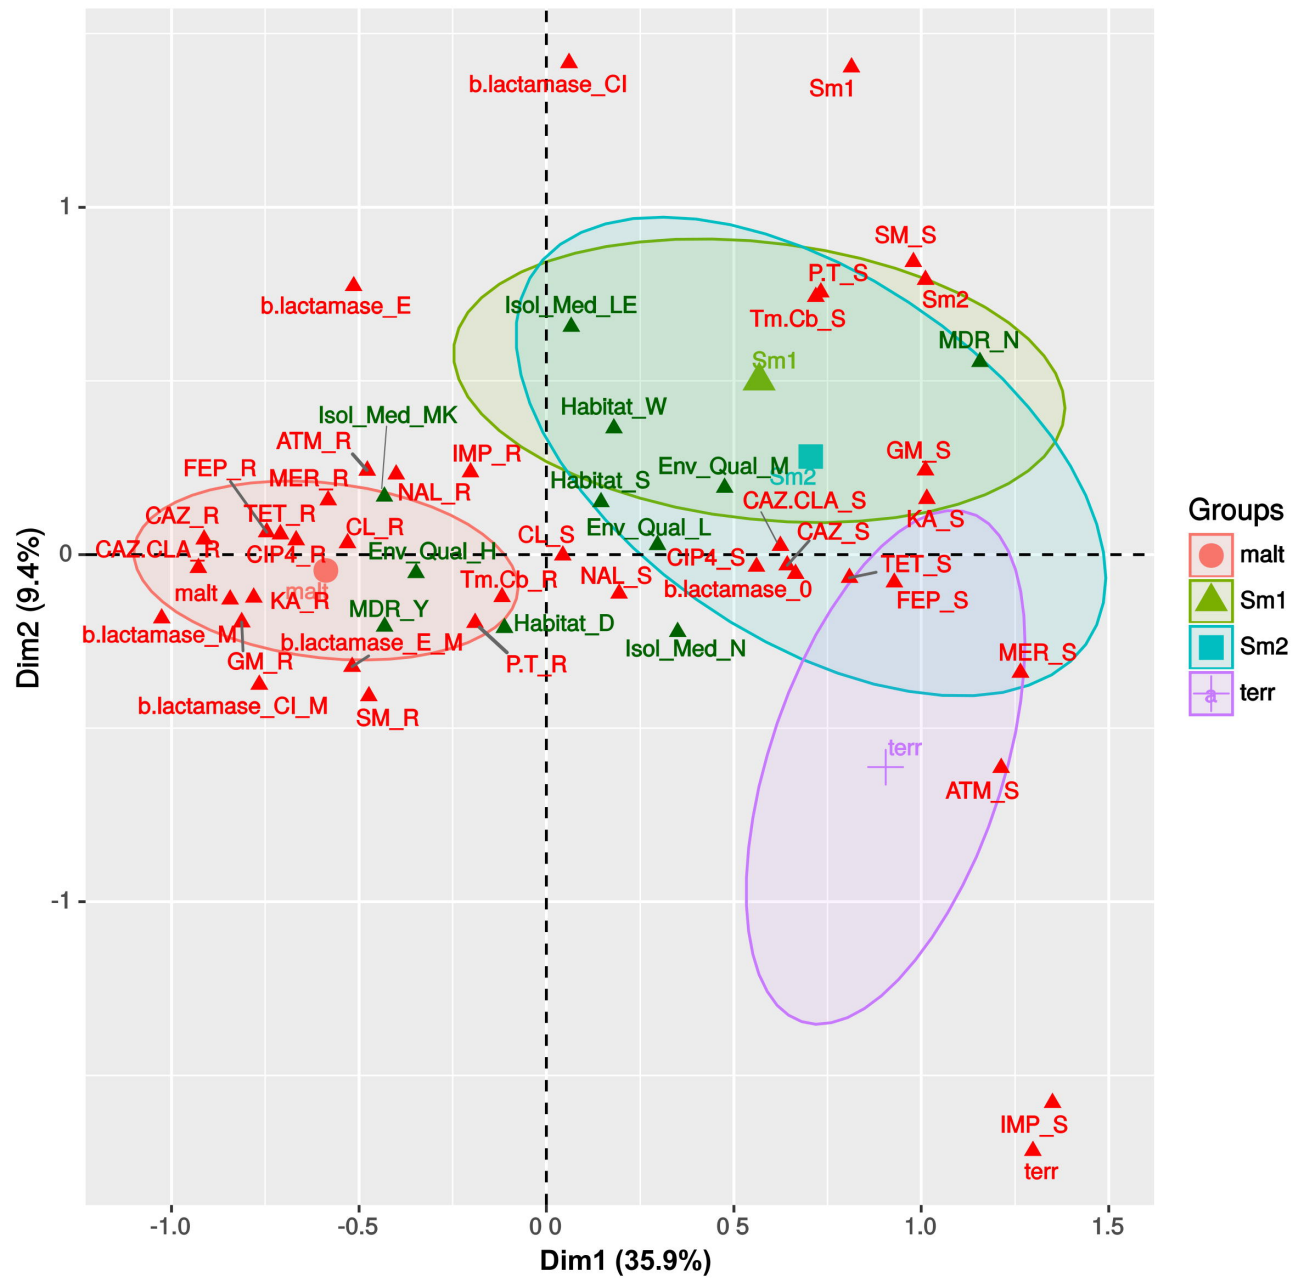

Source: http://www.biorxiv.org/content/10.1101/138990v2.full.pdf
